# Supplementary material for: Effectively designing infrared nonlinear optical materials with magnetism, MMn6Ga6S16 (M = Ca, Sr, Ba, and Pb), aided by stable open frameworks
Source: Royal Society of Chemistry journal article supplement (doi:10.1039/d4qi01084a), 2024-01-01
Supplement: d4qi01084a1.pdf [file d4qi01084a1.pdf]

## Supporting Information

### **Effectively Designing Infrared Nonlinear Optical Materials with Magnetism, MMn<sub>6</sub>Ga<sub>6</sub>S<sub>16</sub> (M=Ca, Sr, Ba, Pb) Aided by the Stable Open Frameworks**

*Kaixuan Li<sup>a</sup>, Yujie Zhang<sup>a</sup>, Xianchao Zhu<sup>a\*</sup>, Hongping Wu<sup>a\*</sup>, Zhanggui Hu<sup>a</sup>, Jiyang Wang<sup>a</sup> and Yicheng Wu<sup>a</sup>*  
*<sup>a</sup>Tianjin Key Laboratory of Functional Crystal Materials, Institute of Functional Crystal, Tianjin University of  
Technology, Tianjin 300384, China.*

# CONTENTS

|                                                                                                                                                                                                    |    |
|----------------------------------------------------------------------------------------------------------------------------------------------------------------------------------------------------|----|
| <b>Experimental Section</b> .....                                                                                                                                                                  | 3  |
| <b>Table S1.</b> Crystal data and structure refinement for $MMn_6Ga_6S_{16}$ (M=Ca, Sr, Ba, Pb). .....                                                                                             | 6  |
| <b>Table S2a.</b> Atoms coordinate, equivalent isotropic displacement parameters, and BVS for $CaMn_6Ga_6S_{16}$ .....                                                                             | 7  |
| <b>Table S2b.</b> Atoms coordinate, equivalent isotropic displacement parameters, and BVS for $SrMn_6Ga_6S_{16}$ .....                                                                             | 8  |
| <b>Table S2c.</b> Atoms coordinate, equivalent isotropic displacement parameters, and BVS for $BaMn_6Ga_6S_{16}$ .....                                                                             | 9  |
| <b>Table S2d.</b> Atoms coordinate, equivalent isotropic displacement parameters, and BVS for $PbMn_6Ga_6S_{16}$ .....                                                                             | 10 |
| <b>Table S3a.</b> A(II)B <sub>3</sub> C <sub>3</sub> Q <sub>8</sub> and M(II)B <sub>6</sub> C <sub>6</sub> Q <sub>16</sub> structural data and some optical performances. ....                     | 11 |
| <b>Table S3b.</b> Optical properties of compounds AB <sub>3</sub> C <sub>3</sub> S <sub>8</sub> and $MMn_6Ga_6S_{16}$ . ....                                                                       | 12 |
| <b>Table S4a.</b> Selected bond distances (Å) and angles (deg) for $CaMn_6Ga_6S_{16}$ .....                                                                                                        | 13 |
| <b>Table S4b.</b> Selected bond distances (Å) and angles (deg) for $SrMn_6Ga_6S_{16}$ .....                                                                                                        | 16 |
| <b>Table S4c.</b> Selected bond distances (Å) and angles (deg) for $BaMn_6Ga_6S_{16}$ .....                                                                                                        | 21 |
| <b>Table S4d.</b> Selected bond distances (Å) and angles (deg) for $PbMn_6Ga_6S_{16}$ .....                                                                                                        | 26 |
| <b>Table S5a.</b> Calculated distortion degree of MnS <sub>6</sub> or MgS <sub>6</sub> groups .....                                                                                                | 31 |
| <b>Table S5b.</b> Calculated distortion degree of GaS <sub>4</sub> groups.....                                                                                                                     | 32 |
| <b>Table S6.</b> The diameters of three size of channels in compounds.....                                                                                                                         | 34 |
| <b>Figure S1.</b> Experimental and calculated PXRD of $SrMn_6Ga_6S_{16}$ , $BaMn_6Ga_6S_{16}$ and $PbMn_6Ga_6S_{16}$ .....                                                                         | 35 |
| <b>Figure S2.</b> The UV–vis–NIR diffuse reflectance spectra for $MMn_6Ga_6S_{16}$ (M=Ca, Sr, Ba, Pb).....                                                                                         | 36 |
| <b>Figure S3.</b> Birefringence measurement of $SrMn_6Ga_6S_{16}$ , $BaMn_6Ga_6S_{16}$ and $PbMn_6Ga_6S_{16}$ .....                                                                                | 37 |
| <b>Figure S4.</b> The arrangement of GaS <sub>4</sub> tetrahedra in the structure of $MMn_6Ga_6S_{16}$ (M=Ca, Sr, Ba, Pb) .....                                                                    | 38 |
| <b>Figure S5.</b> The magnetization curve for $MMn_6Ga_6S_{16}$ (M=Ca, Sr, Ba, Pb).....                                                                                                            | 39 |
| <b>Figure S6.</b> The arrangement of A-site cations in compounds NaMg <sub>3</sub> Ga <sub>3</sub> S <sub>8</sub> , CaMg <sub>6</sub> Ga <sub>6</sub> S <sub>16</sub> and $CaMn_6Ga_6S_{16}$ ..... | 40 |

## Experimental Methods

### Syntheses

MMn<sub>6</sub>Ga<sub>6</sub>S<sub>16</sub> (M=Ca, Sr, Ba, Pb) were synthesized by the conventional solid-state method. The initial reagents including CaS (Aladdin, 99.9%), SrS (Aladdin, 99.5%), BaS (Aladdin, 99 %), PbS (Aladdin, 99.9%), MnS (Aladdin, 99.9%), Ga<sub>2</sub>S<sub>3</sub> (Aladdin, 95%) and S (Aladdin, 99%) were used without further purification. Stoichiometric amounts of reactants were mixed thoroughly and heated in the corundum crucibles. The reactants, reaction time, and temperature for all compound are listed below.

MMn<sub>6</sub>Ga<sub>6</sub>S<sub>16</sub> (M=Ca, Sr, Ba, Pb): CaMn<sub>6</sub>Ga<sub>6</sub>S<sub>16</sub> was synthesized using CaS (0.0273 g), MnS (0.1977 g), Ga<sub>2</sub>S<sub>3</sub> (0.2543g), and S (0.0206g). After weighing the raw materials, they were ground evenly, and loaded into a small graphite crucible, and then the crucibles were flame-sealed under a pressure of 10<sup>-3</sup> Pa in a fused-silica tube. The mixtures were heated from room temperature to 950 C in 15 h, held at that temperature for 40 h, cooled to 900 °C in 50 h, and finally cooled to room temperature in 24 h. SrMn<sub>6</sub>Ga<sub>6</sub>S<sub>16</sub>, BaMn<sub>6</sub>Ga<sub>6</sub>S<sub>16</sub> and PbMn<sub>6</sub>Ga<sub>6</sub>S<sub>16</sub> were also successfully synthesized under identical conditions.

### Single Crystal X-ray Diffraction

Single-crystal data was collected on a Bruker SMART APEX III 4 K CCD diffractometer using Mo-K $\alpha$  ( $\lambda$  = 0.71073 Å) radiation at 293(2) K. The structure of three crystals were solved directly by the SHELXTL crystallographic software package and all atoms were refined by the full-matrix least squares technique. The final structures were examined for the presence of any missing symmetry elements using PLATON, and no additional higher symmetry elements were identified. The crystal data and structure refinement details are listed in Table S1 and the atomic coordination, displacement parameters, bond valence sums (BVSs), and selected bond lengths and angles are summarized in Tables S2

### Powder XRD

MMn<sub>6</sub>Ga<sub>6</sub>S<sub>16</sub> (M=Ca, Sr, Ba, Pb) were tested using a SmartLab9KW powder X-ray diffractometer. The experimental XRD spectra of the title compounds were measured using X-rays with Cu K $\alpha$  radiation ( $\lambda$  = 1.541 Å) at room temperature, and the measurement results show that the PXRD patterns of the as-synthesized samples match the calculated ones derived from their single crystal data. The results of refining powder by the Rietveld method are in reasonable ranges, indicating the high purity and crystallinity of the as-prepared samples. The fitted profile matches the experimental data well, giving the acceptance R values of  $R_p$  = 0.08 for CaMn<sub>6</sub>Ga<sub>6</sub>S<sub>16</sub>,

respectively, with all of the observed Bragg reflections indexed into the space group of  $P\bar{6}$ .

## Infrared spectroscopy

The IR spectra of  $MMn_6Ga_6S_{16}$  (M=Ca, Sr, Ba, Pb) were recorded on a Nicolet iS50 Fourier transform infrared (FTIR) spectrometer in the range of 600–4000  $cm^{-1}$ . The silicates were ground and mixed with KBr.

## UV-vis-NIR diffuse-reflectance spectra

The UV-vis-NIR diffuse reflectance spectra of  $MMn_6Ga_6S_{16}$  (M=Ca, Sr, Ba, Pb) were measured at room temperature with a Shimadzu SolidSpec-3700DUV spectrophotometer. The wavelengths of the spectra were in the range 240–2000 nm. Absorption (K/S) data were calculated from the following Kubelka–Munk function:  $F(R) = (1-R)^2/2R = K/S$ , R represents the reflectance, K the absorption, and S the scattering factor.

## Birefringence measurement.

The birefringence was measured using a Nikon Eclipse polarizing microscope E200MV POL with a halogen lamp. According to the formula  $R = \Delta n \times d$ , where R,  $\Delta n$ , and d represent optical path difference, birefringence, and thickness, respectively. The birefringence was calculated by measuring the optical path compared with the Michel-Levy chart and the thickness with a Bruker SMART APEX II. The transparent  $MMn_6Ga_6S_{16}$  (M=Ca, Sr, Ba, Pb) crystal was selected for the measurement to ensure the result's precision.

## SHG measurement

The SHG responses were measured based on the Kurtz–Perry method by irradiation of a 2090 nm Q-switched laser (50 ns, 3 Hz) with the AGS as a reference. Further, their effective NLO coefficients  $d_{\text{eff}}$  were calculated using the formula  $d_{\text{eff}} = d_{\text{eff, AGS}} (I^{2\omega}/I^{2\omega}_{\text{AGS}})^{1/2}$  ( $I^{2\omega}$  and  $I^{2\omega}_{\text{AGS}}$  are SHG intensities for sample and AGS, respectively) with polycrystalline  $d_{\text{eff, AGS}} = 11.8 \text{ pm V}^{-1}$  (polycrystalline  $d_{\text{eff, AGS}}$  is the angular average of single-crystal  $d_{36, \text{AGS}} = 13.7 \text{ pm V}^{-1}$ ).

## Laser damage threshold measurement.

The LDTs of the  $MMn_6Ga_6S_{16}$  (M=Ca, Sr, Ba, Pb) and AGS powder at the particle size range of 180–250  $\mu\text{m}$  were evaluated under using high-power laser irradiation of 1064 nm (pulse width  $\tau_p = 10 \text{ ns}$ ) by the single-pulse method. The measurement processes were performed by gradually increasing the laser power until the damaged spot was observed under a microscope. The damage thresholds were derived from the equation  $I_{(\text{threshold})} = E/(\pi r^2 \tau_p)$ , where E is the laser energy of a single pulse, r is the spot radius, and  $\tau_p$  is the pulse width.

## **Magnetic properties measurement**

The temperature dependence of magnetization (M-T) of  $MMn_6Ga_6S_{16}$  (M=Ca, Sr, Ba, Pb) powder are investigated after zero-field cooling (ZFC) and field cooling (FC) processes under an applied field of  $H = 5000$  Oe utilizing a physical properties measurement system (PPMS 9 T, Quantum Design).

**Table S1.** Crystallographic Data and Refinement Details for CaMn<sub>6</sub>Ga<sub>6</sub>S<sub>16</sub>, SrMn<sub>6</sub>Ga<sub>6</sub>S<sub>16</sub>, BaMn<sub>6</sub>Ga<sub>6</sub>S<sub>16</sub> and PbMn<sub>6</sub>Ga<sub>6</sub>S<sub>16</sub>.

| Empirical formula                                                     | CaMn <sub>6</sub> Ga <sub>6</sub> S <sub>16</sub> | SrMn <sub>6</sub> Ga <sub>6</sub> S <sub>16</sub> | BaMn <sub>6</sub> Ga <sub>6</sub> S <sub>16</sub> | PbMn <sub>6</sub> Ga <sub>6</sub> S <sub>16</sub> |
|-----------------------------------------------------------------------|---------------------------------------------------|---------------------------------------------------|---------------------------------------------------|---------------------------------------------------|
| Formula weight                                                        | 1301.00                                           | 1348.54                                           | 1398.26                                           | 1468.11                                           |
| Temperature                                                           |                                                   |                                                   | 297(2) K                                          |                                                   |
| Crystal system                                                        |                                                   |                                                   | Hexagonal                                         |                                                   |
| Space group                                                           |                                                   |                                                   | $P\bar{6}$                                        |                                                   |
| Z                                                                     |                                                   |                                                   | 3                                                 |                                                   |
| <i>a</i> (Å)                                                          | 16.7529(7)                                        | 16.8606(5)                                        | 16.9985(5)                                        | 16.8215(3)                                        |
| <i>c</i> (Å)                                                          | 7.4170(5)                                         | 7.4237(3)                                         | 7.4406(4)                                         | 7.4281(2)                                         |
| <i>V</i> (Å <sup>3</sup> )                                            | 1802.76(19)                                       | 1827.67(13)                                       | 1861.91(15)                                       | 1820.28                                           |
| <i>D<sub>c</sub></i> (g cm <sup>-3</sup> )                            | 3.595                                             | 3.676                                             | 3.741                                             | 4.018                                             |
| <i>μ</i> (mm <sup>-1</sup> )                                          | 11.236                                            | 13.038                                            | 12.226                                            | 17.821                                            |
| <i>F</i> (000)                                                        | 1836                                              | 1890                                              | 1944                                              | 2022                                              |
| Crystal size (mm <sup>3</sup> )                                       | 0.258 x 0.135 x 0.105                             | 0.222 x 0.075 x 0.049                             | 0.121 x 0.117 x 0.063                             | 0.258 x 0.135 x 0.105                             |
| Radiation                                                             | Mo-K <sub>α</sub> (λ = 0.71073)                   |
| 2θ range (°)                                                          | 2.43 to 25.02                                     | 2.41 to 25.00                                     | 2.39 to 25.02                                     | 2.42 to 25.01                                     |
| Reflections collected                                                 | 13489                                             | 10981                                             | 14168                                             | 12016                                             |
| Indep. Reflns/ Rint                                                   | 2300 / 0.0420                                     | 2322/0.0401                                       | 2375 /0.0423                                      | 2275 / 0.0322                                     |
| GOOF on F <sup>2</sup>                                                | 1.064                                             | 1.075                                             | 1.089                                             | 1.093                                             |
| <i>R<sub>I</sub></i> , <i>wR<sub>2</sub></i> (I > 2σ(I)) <sup>a</sup> | 0.0396, 0.1189                                    | 0.0295, 0.0798                                    | 0.0250, 0.0480                                    | 0.0273, 0.0768                                    |
| <i>R<sub>I</sub></i> , <i>wR<sub>2</sub></i> (all data)               | 0.0444, 0.1276                                    | 0.0367, 0.0852                                    | 0.0276, 0.0494                                    | 0.0407, 0.0836                                    |
| Absolute structure parameter                                          | 0.025(10)                                         | 0.018(8)                                          | 0.022(9)                                          | 0.027(1)                                          |
| Extinction coefficient                                                | 0.0049(6)                                         | 0.0028(2)                                         | 0.0020(3)                                         | 0.0016 (4)                                        |
| Largest diff. peak and hole (e.Å <sup>-3</sup> )                      | 2.470, -1.552                                     | 3.294, -1.347                                     | 0.684, -0.703                                     | 2.023, -0.628                                     |

$$^a R_1 = \frac{\sum ||F_o| - |F_c||}{\sum |F_o|}, ^b wR_2 = \frac{\sum w(F_o^2 - F_c^2)^2}{\sum w(F_o^2)^2}^{1/2}$$

**Table S2a.** Atomic coordinates ( $\times 10^4$ ) and equivalent isotropic displacement parameters ( $\text{\AA}^2 \times 10^3$ ) for  $\text{CaMn}_6\text{Ga}_6\text{S}_{16}$ .  $U_{\text{eq}}$  is defined as one-third of the trace of the orthogonalized  $U_{ij}$  tensor

| Atom  | BVS <sup>a</sup> | Wyckoff | x        | y       | z       | $U_{\text{eq}}(\text{\AA})$ |
|-------|------------------|---------|----------|---------|---------|-----------------------------|
| Ca(1) | 1.6              | 1b      | 0        | 0       | 5000    | 26(3)                       |
| Ca(2) | 1.55             | 1f      | 6667     | 3333    | 5000    | 28(3)                       |
| Ca(3) | 1.57             | 1d      | 3333     | 6667    | 5000    | 36(3)                       |
| Ga(1) | 3.09             | 6l      | 4479(2)  | 3012(2) | 2481(3) | 14(1)                       |
| Ga(2) | 2.91             | 6l      | 244(1)   | 2205(2) | 2486(3) | 12(1)                       |
| Ga(3) | 3.03             | 6l      | 3695(2)  | 4763(2) | 2492(2) | 12(1)                       |
| Mn(1) | 1.91             | 3j      | 1407(3)  | 4285(4) | 0       | 16(1)                       |
| Mn(2) | 1.93             | 3k      | 1394(3)  | 4192(3) | 5000    | 16(1)                       |
| Mn(3) | 1.99             | 3k      | 6176(4)  | 5352(3) | 5000    | 17(1)                       |
| Mn(4) | 1.94             | 3j      | 6236(4)  | 5330(3) | 0       | 18(1)                       |
| Mn(5) | 2.03             | 3k      | -1990(4) | 359(3)  | 0       | 17(1)                       |
| Mn(6) | 2.08             | 3k      | -2006(4) | 446(3)  | 5000    | 18(1)                       |
| S(1)  | 2.01             | 3j      | 717(5)   | 5375(5) | 0       | 11(2)                       |
| S(2)  | 1.88             | 3k      | 1199(6)  | 2536(6) | 5000    | 11(2)                       |
| S(3)  | 1.87             | 3k      | 4113(5)  | 2072(5) | 5000    | 13(1)                       |
| S(4)  | 1.97             | 3k      | 4602(5)  | 5391(6) | 5000    | 12(2)                       |
| S(5)  | 1.91             | 3j      | 4048(5)  | 2050(5) | 0       | 13(2)                       |
| S(6)  | 1.97             | 6l      | -858(4)  | 729(4)  | 2543(6) | 12(1)                       |
| S(7)  | 2.14             | 6l      | 3235(4)  | 3235(4) | 2498(7) | 13(1)                       |
| S(8)  | 1.92             | 6l      | 5913(4)  | 4176(4) | 2540(6) | 15(1)                       |
| S(9)  | 1.96             | 3j      | 1214(6)  | 2604(7) | 0       | 12(2)                       |
| S(10) | 1.93             | 6l      | 2549(4)  | 5074(4) | 2538(6) | 14(1)                       |
| S(11) | 1.86             | 6l      | 39(4)    | 3449(5) | 2505(6) | 14(2)                       |

<sup>a</sup>Bond valence state was calculated using the empirical formula  $V_i = \sum S_{ij} = \sum \exp[(r_0 - r_{ij})/0.37]$ , where  $S_{ij}$  is the bond valence associated with bond lengths  $r_{ij}$  and  $r_0$ .

**Table S2b.** Atomic coordinates ( $\times 10^4$ ) and equivalent isotropic displacement parameters ( $\text{\AA}^2 \times 10^3$ ) for  $\text{SrMn}_6\text{Ga}_6\text{S}_{16}$ .  $U_{\text{eq}}$  is defined as one-third of the trace of the orthogonalized  $U_{ij}$  tensor

| Atom  | BVS <sup>a</sup> | Wyckoff | x       | y       | z       | $U_{\text{eq}}(\text{\AA})$ |
|-------|------------------|---------|---------|---------|---------|-----------------------------|
| Sr(1) | 1.78             | 1e      | 6667    | 3333    | 10000   | 22(1)                       |
| Sr(2) | 1.84             | 1a      | 0       | 0       | 10000   | 24(1)                       |
| Sr(3) | 1.82             | 1c      | 3333    | 6667    | 10000   | 20(1)                       |
| Ga(1) | 2.93             | 6l      | 5536(1) | 6902(1) | 7475(2) | 10(1)                       |
| Ga(2) | 2.97             | 6l      | 2271(1) | 1903(1) | 7485(2) | 10(1)                       |
| Ga(3) | 2.92             | 6l      | 4794(1) | 3643(1) | 7467(2) | 11(1)                       |
| Mn(1) | 2.04             | 3j      | 3797(2) | 4647(2) | 10000   | 16(1)                       |
| Mn(2) | 2.07             | 3k      | 3698(2) | 4650(2) | 5000    | 15(1)                       |
| Mn(3) | 1.98             | 3j      | 4134(2) | 1298(2) | 10000   | 15(1)                       |
| Mn(4) | 1.90             | 3j      | 561(2)  | 2501(2) | 10000   | 14(1)                       |
| Mn(5) | 1.98             | 3k      | 4220(2) | 1312(2) | 5000    | 13(1)                       |
| Mn(6) | 1.93             | 3k      | 475(2)  | 2412(2) | 5000    | 14(1)                       |
| S(1)  | 1.89             | 6l      | 6774(3) | 6709(2) | 7505(7) | 11(1)                       |
| S(2)  | 2.12             | 6l      | 3336(2) | 3427(2) | 7505(7) | 10(1)                       |
| S(3)  | 1.90             | 3k      | 5345(4) | 4602(3) | 5000    | 11(1)                       |
| S(4)  | 1.80             | 3j      | 5390(4) | 4570(4) | 10000   | 12(1)                       |
| S(5)  | 2.03             | 6l      | 4086(3) | 5775(3) | 7510(5) | 12(1)                       |
| S(6)  | 1.96             | 6l      | 5012(3) | 2449(3) | 7521(5) | 12(1)                       |
| S(7)  | 1.90             | 3j      | 2508(4) | 1245(4) | 10000   | 11(1)                       |
| S(8)  | 1.97             | 3k      | 2599(4) | 1306(4) | 5000    | 11(1)                       |
| S(9)  | 1.82             | 3j      | 5827(4) | 7837(4) | 10000   | 11(1)                       |
| S(10) | 1.95             | 3k      | 5909(4) | 7865(4) | 5000    | 11(1)                       |
| S(11) | 1.89             | 6l      | 835(3)  | 1645(3) | 7517(4) | 12(1)                       |

<sup>a</sup>Bond valence state was calculated using the empirical formula  $V_i = \sum S_{ij} = \sum \exp[(r_0 - r_{ij})/0.37]$ , where  $S_{ij}$  is the bond valence associated with bond lengths  $r_{ij}$  and  $r_0$ .



**Table S2c.** Atomic coordinates ( $\times 10^4$ ) and equivalent isotropic displacement parameters ( $\text{\AA}^2 \times 10^3$ ) for  $\text{BaMn}_6\text{Ga}_6\text{S}_{16}$ .  $U_{\text{eq}}$  is defined as one-third of the trace of the orthogonalized  $U_{ij}$  tensor

| Atom  | BVS <sup>a</sup> | Wyckoff | x        | y       | z        | $U_{\text{eq}}(\text{\AA})$ |
|-------|------------------|---------|----------|---------|----------|-----------------------------|
| Ba(1) | 2.15             | 1d      | 3333     | 6667    | 5000     | 18(1)                       |
| Ba(2) | 2.11             | 1e      | 6667     | 3333    | 0        | 16(1)                       |
| Ba(3) | 2.21             | 1a      | 0        | 0       | 0        | 13(1)                       |
| Ga(1) | 2.90             | 6l      | 4485(1)  | 3032(1) | 2521(2)  | 13(1)                       |
| Ga(2) | 2.95             | 6l      | 3705(1)  | 4758(1) | 2492(2)  | 12(1)                       |
| Ga(3) | 2.95             | 6l      | 223(1)   | 2203(1) | 2504(2)  | 12(1)                       |
| Mn(1) | 1.99             | 3j      | 6160(2)  | 5369(2) | 0        | 12(1)                       |
| Mn(2) | 1.95             | 3k      | 1393(2)  | 4164(2) | 5000     | 14(1)                       |
| Mn(3) | 1.91             | 3j      | 1378(2)  | 4201(2) | 0        | 22(1)                       |
| Mn(4) | 1.98             | 3k      | 4615(2)  | 857(2)  | 5000     | 21(1)                       |
| Mn(5) | 2.03             | 3j      | -2049(2) | 450(2)  | 0        | 23(1)                       |
| Mn(6) | 2.07             | 3k      | 2414(2)  | 2034(2) | 5000     | 17(1)                       |
| S(1)  | 1.77             | 3j      | 4185(3)  | 2120(5) | 0        | 12(1)                       |
| S(2)  | 2.07             | 6l      | 5863(3)  | 4255(2) | 2516(3)  | 13(1)                       |
| S(3)  | 1.83             | 3k      | 4114(3)  | 2084(5) | 5000     | 14(1)                       |
| S(4)  | 2.14             | 6l      | 3252(2)  | 3244(2) | 2497(10) | 12(1)                       |
| S(5)  | 1.79             | 3k      | 4596(6)  | 5433(6) | 5000     | 14(1)                       |
| S(6)  | 1.90             | 6l      | 46(2)    | 3435(2) | 2496(10) | 12(1)                       |
| S(7)  | 2.09             | 6l      | 2494(3)  | 4945(3) | 2488(3)  | 15(1)                       |
| S(8)  | 1.97             | 3j      | 778(3)   | 5392(6) | 0        | 12(1)                       |
| S(9)  | 1.94             | 3k      | 1162(4)  | 2528(3) | 5000     | 13(1)                       |
| S(10) | 1.77             | 3j      | 1146(4)  | 2483(3) | 0        | 12(1)                       |
| S(11) | 2.14             | 6l      | -935(2)  | 784(3)  | 2494(3)  | 14(1)                       |

<sup>a</sup>Bond valence state was calculated using the empirical formula  $V_i = \sum S_{ij} = \sum \exp[(r_0 - r_{ij})/0.37]$ , where  $S_{ij}$  is the bond valence associated with bond lengths  $r_{ij}$  and  $r_0$ .

**Table S2d.** Atomic coordinates ( $\times 10^4$ ) and equivalent isotropic displacement parameters ( $\text{\AA}^2 \times 10^3$ ) for  $\text{PbMn}_6\text{Ga}_6\text{S}_{16}$ .  $U_{\text{eq}}$  is defined as one-third of the trace of the orthogonalized  $U_{ij}$  tensor

| Atom  | BVS <sup>a</sup> | Wyckoff | x        | y       | z       | $U_{\text{eq}}(\text{\AA})$ |
|-------|------------------|---------|----------|---------|---------|-----------------------------|
| Pb(1) | 1.59             | 1c      | 3333     | 6667    | 10000   | 27(1)                       |
| Pb(2) | 1.66             | 1a      | 0        | 0       | 10000   | 29(1)                       |
| Pb(3) | 1.68             | 1e      | 6667     | 3333    | 0       | 26(1)                       |
| Ga(1) | 2.97             | 6l      | 376(1)   | 2276(1) | 7501(4) | 13(1)                       |
| Ga(2) | 2.93             | 6l      | 1148(1)  | 4798(1) | 7503(4) | 14(1)                       |
| Ga(3) | 2.95             | 6l      | 4465(1)  | 3089(1) | 2499(3) | 13(1)                       |
| Mn(1) | 1.92             | 3j      | -1949(3) | 502(3)  | 10000   | 20(1)                       |
| Mn(2) | 1.96             | 3k      | -1947(3) | 512(3)  | 5000    | 19(1)                       |
| Mn(3) | 2.03             | 3k      | 2872(3)  | 4170(3) | 5000    | 18(1)                       |
| Mn(4) | 1.97             | 3j      | 2886(3)  | 4188(3) | 10000   | 18(1)                       |
| Mn(5) | 2.02             | 3k      | 6255(3)  | 5359(3) | 5000    | 21(1)                       |
| Mn(6) | 2.12             | 3j      | 6274(3)  | 5361(3) | 0       | 20(1)                       |
| S(1)  | 1.93             | 6l      | -808(2)  | 831(2)  | 7496(9) | 16(1)                       |
| S(2)  | 1.97             | 3j      | 1291(5)  | 2574(5) | 10000   | 16(2)                       |
| S(3)  | 1.98             | 3k      | 1283(5)  | 2556(5) | 5000    | 14(2)                       |
| S(4)  | 2.16             | 6l      | -92(2)   | 3335(2) | 7533(5) | 13(1)                       |
| S(5)  | 1.88             | 3k      | 785(6)   | 5370(5) | 5000    | 17(2)                       |
| S(6)  | 1.87             | 3j      | 762(6)   | 5362(5) | 10000   | 14(2)                       |
| S(7)  | 1.94             | 6l      | 2565(2)  | 5018(2) | 7489(8) | 16(1)                       |
| S(8)  | 1.91             | 6l      | 3230(2)  | 3292(2) | 2532(5) | 14(1)                       |
| S(9)  | 1.92             | 3k      | 4127(5)  | 2144(5) | 5000    | 14(2)                       |
| S(10) | 1.98             | 3j      | 4117(5)  | 2144(5) | 0       | 16(2)                       |
| S(11) | 1.94             | 6l      | 5919(2)  | 4223(2) | 2493(8) | 16(1)                       |

<sup>a</sup>Bond valence state was calculated using the empirical formula  $V_i = \sum S_{ij} = \sum \exp[(r_0 - r_{ij})/0.37]$ , where  $S_{ij}$  is the bond valence associated with bond lengths  $r_{ij}$  and  $r_0$ .

**Table S3a.** A(I)B<sub>3</sub>CQ<sub>8</sub> and M(II)B<sub>6</sub>C<sub>6</sub>Q<sub>16</sub> structural data and some optical performances (the red part represents the title compounds).

| Compound                                           | cell parameters<br>(Å) | SHG<br>(×AGS) | E <sub>g</sub><br>(eV) | Δn<br>@1064nm | Curie constant / Weiss constant<br>(emu K mol <sup>-1</sup> /K) |
|----------------------------------------------------|------------------------|---------------|------------------------|---------------|-----------------------------------------------------------------|
| NaMg <sub>3</sub> Ga <sub>3</sub> S <sub>8</sub>   | a=b=16.7467 c=3.7032   | 0.3           | 3.70                   | 0.03@546nm    | /                                                               |
| LiMg <sub>3</sub> Ga <sub>3</sub> S <sub>8</sub>   | a=b=16.6837 c=3.7004   | /             | 3.86                   | /             | /                                                               |
| NaMg <sub>3</sub> Al <sub>3</sub> S <sub>8</sub>   | a=b=16.7100 c=3.6921   | 0.4           | 4.20                   | 0.02@546nm    |                                                                 |
| AgMg <sub>3</sub> Ga <sub>3</sub> S <sub>8</sub>   | a=b=16.8433 c=3.7066   | 0.3           | 3.59                   | 0.091@546nm   | /                                                               |
| CuMg <sub>3</sub> Ga <sub>3</sub> S <sub>8</sub>   | a=b=16.6442 c=3.6963   | /             | /                      | /             | /                                                               |
| AgMg <sub>3</sub> Ga <sub>3</sub> Se <sub>8</sub>  | a=b=17.6600 c=3.8930   | /             | /                      | 0.17@546nm    | /                                                               |
| LiMg <sub>3</sub> Ga <sub>3</sub> Se <sub>8</sub>  | a=b=17.4769 c=3.8678   | /             | 2.67                   | /             | /                                                               |
| NaMg <sub>3</sub> Ga <sub>3</sub> Se <sub>8</sub>  | a=b=17.5765 c=3.8811   | 0.8           | 2.77                   | 0.079@546nm   |                                                                 |
| NaMg <sub>3</sub> Al <sub>3</sub> Se <sub>8</sub>  | a=b=17.5753 c=3.8769   | /             | /                      | /             | /                                                               |
| NaMn <sub>3</sub> Ga <sub>3</sub> S <sub>8</sub>   | a=b=16.7891 c=3.7083   | 1.6           | 2.50                   | 0.175@2050nm  | /                                                               |
| CaMg <sub>6</sub> Ga <sub>6</sub> S <sub>16</sub>  | a=b=16.7006 c=7.3916   | 0.7           | 3.54                   | 0.046         | /                                                               |
| SrMg <sub>6</sub> Ga <sub>6</sub> S <sub>16</sub>  | a=b=16.8029 c=7.4102   | 0.8           | 3.51                   | 0.042         | /                                                               |
| BaMg <sub>6</sub> Ga <sub>6</sub> S <sub>16</sub>  | a=b=16.9301 c=7.4225   | 0.8           | 3.50                   | 0.041         | /                                                               |
| CaMg <sub>6</sub> Ga <sub>6</sub> Se <sub>16</sub> | a=b=17.5327 c=7.7603   | 1.6           | 2.71                   | 0.052         | /                                                               |
| SrMg <sub>6</sub> Ga <sub>6</sub> Se <sub>16</sub> | a=b=17.6115 c=7.7684   | 1.0           | 2.71                   | 0.048         | /                                                               |
| BaMg <sub>6</sub> Ga <sub>6</sub> Se <sub>16</sub> | a=b=17.7326 c=7.7899   | 1.1           | 2.69                   | 0.044         | /                                                               |
| LaMg <sub>6</sub> Ga <sub>6</sub> S <sub>16</sub>  | a=b=16.7006 c=7.3916   | 0.8           | 3.00                   | 0.041         | /                                                               |
| CaMn <sub>6</sub> Ga <sub>6</sub> S <sub>16</sub>  | a=b=16.7529 c=7.4170   | 0.4           | 2.58                   | 0.045         | C=4.73 θ=-130.71                                                |
| SrMn <sub>6</sub> Ga <sub>6</sub> S <sub>16</sub>  | a=b=16.8606 c=7.4237   | 0.5           | 2.40                   | 0.046         | C=3.97 θ=-125.03                                                |
| BaMn <sub>6</sub> Ga <sub>6</sub> S <sub>16</sub>  | a=b=16.9986 c=7.4410   | 0.5           | 2.55                   | 0.060         | C=3.96 θ=-114.09                                                |
| PbMn <sub>6</sub> Ga <sub>6</sub> S <sub>16</sub>  | a=b=16.8215 c=7.4281   | 0.7           | 2.05                   | 0.049         | C=4.18 θ=-134.54                                                |

**Table S3b.** Optical properties of compounds  $AB_3C_3S_8$  and  $MMn_6Ga_6S_{16}$ .

| <b>Compounds</b>                                    | <b>SHG (<math>\times</math>AGS)</b> | <b><math>E_g</math> (eV)</b> | <b><math>\Delta n</math> @1064nm</b> |
|-----------------------------------------------------|-------------------------------------|------------------------------|--------------------------------------|
| <b>NaMg<sub>3</sub>Ga<sub>3</sub>S<sub>8</sub></b>  | <b>0.3</b>                          | <b>3.70</b>                  | <b>0.03@546nm</b>                    |
| <b>LiMg<sub>3</sub>Ga<sub>3</sub>S<sub>8</sub></b>  | <b>/</b>                            | <b>3.86</b>                  | <b>/</b>                             |
| <b>NaMg<sub>3</sub>Al<sub>3</sub>S<sub>8</sub></b>  | <b>0.4</b>                          | <b>4.20</b>                  | <b>0.02@546nm</b>                    |
| <b>AgMg<sub>3</sub>Ga<sub>3</sub>S<sub>8</sub></b>  | <b>0.3</b>                          | <b>3.59</b>                  | <b>0.091@546nm</b>                   |
| <b>CuMg<sub>3</sub>Ga<sub>3</sub>S<sub>8</sub></b>  | <b>/</b>                            | <b>/</b>                     | <b>/</b>                             |
| <b>CaMn<sub>6</sub>Ga<sub>6</sub>S<sub>16</sub></b> | <b>0.4</b>                          | <b>2.58</b>                  | <b>0.045</b>                         |
| <b>SrMn<sub>6</sub>Ga<sub>6</sub>S<sub>16</sub></b> | <b>0.5</b>                          | <b>2.40</b>                  | <b>0.046</b>                         |
| <b>BaMn<sub>6</sub>Ga<sub>6</sub>S<sub>16</sub></b> | <b>0.5</b>                          | <b>2.55</b>                  | <b>0.060</b>                         |
| <b>PbMn<sub>6</sub>Ga<sub>6</sub>S<sub>16</sub></b> | <b>0.7</b>                          | <b>2.05</b>                  | <b>0.049</b>                         |

**Table S4a.** Selected distances (Å) and angles (degrees) for CaMn<sub>6</sub>Ga<sub>6</sub>S<sub>16</sub>.

|                  |          |                  |           |
|------------------|----------|------------------|-----------|
| Ca(1)-S(6)#11    | 2.938(6) | Mn(1)-S(10)      | 2.534(6)  |
| Ca(1)-S(6)#8     | 2.938(6) | Mn(1)-S(10)#2    | 2.534(6)  |
| Ca(1)-S(6)#3     | 2.938(6) | Mn(1)-S(1)       | 2.604(8)  |
| Ca(1)-S(6)#10    | 2.938(6) | Mn(1)-S(9)       | 2.669(10) |
| Ca(1)-S(6)#12    | 2.938(6) | Mn(1)-S(11)#2    | 2.730(6)  |
| Ca(1)-S(6)       | 2.939(6) | Mn(1)-S(11)      | 2.730(6)  |
| Ca(2)-S(8)       | 2.950(6) | Mn(2)-S(10)#3    | 2.530(6)  |
| Ca(2)-S(8)#13    | 2.950(6) | Mn(2)-S(10)      | 2.530(6)  |
| Ca(2)-S(8)#14    | 2.950(6) | Mn(2)-S(2)       | 2.626(10) |
| Ca(2)-S(8)#6     | 2.950(6) | Mn(2)-S(4)#4     | 2.675(9)  |
| Ca(2)-S(8)#15    | 2.950(6) | Mn(2)-S(11)#3    | 2.703(6)  |
| Ca(2)-S(8)#3     | 2.950(6) | Mn(2)-S(11)      | 2.703(6)  |
| Ca(3)-S(10)#5    | 2.945(5) | Mn(3)-S(8)#3     | 2.556(6)  |
| Ca(3)-S(10)#3    | 2.945(5) | Mn(3)-S(8)       | 2.556(6)  |
| Ca(3)-S(10)#1    | 2.945(5) | Mn(3)-S(11)#5    | 2.612(6)  |
| Ca(3)-S(10)      | 2.945(5) | Mn(3)-S(11)#1    | 2.612(6)  |
| Ca(3)-S(10)#16   | 2.945(5) | Mn(3)-S(3)#6     | 2.655(8)  |
| Ca(3)-S(10)#4    | 2.945(5) | Mn(3)-S(4)       | 2.670(9)  |
| Ga(1)-S(8)       | 2.212(7) | Mn(4)-S(8)#2     | 2.556(6)  |
| Ga(1)-S(7)       | 2.293(5) | Mn(4)-S(8)       | 2.556(6)  |
| Ga(1)-S(5)       | 2.312(5) | Mn(4)-S(5)#6     | 2.598(8)  |
| Ga(1)-S(3)       | 2.320(5) | Mn(4)-S(11)#1    | 2.659(6)  |
| Ga(2)-S(6)       | 2.227(6) | Mn(4)-S(11)#7    | 2.659(6)  |
| Ga(2)-S(11)      | 2.275(6) | Mn(4)-S(1)#1     | 2.709(9)  |
| Ga(2)-S(9)       | 2.324(5) | Mn(5)-S(6)       | 2.523(6)  |
| Ga(2)-S(2)       | 2.336(5) | Mn(5)-S(6)#2     | 2.523(6)  |
| Ga(3)-S(10)      | 2.226(7) | Mn(5)-S(9)#8     | 2.576(7)  |
| Ga(3)-S(7)       | 2.275(6) | Mn(5)-S(7)#9     | 2.624(6)  |
| Ga(3)-S(1)#1     | 2.297(5) | Mn(5)-S(7)#8     | 2.624(6)  |
| Ga(3)-S(4)       | 2.297(5) | Mn(5)-S(5)#8     | 2.797(9)  |
| S(8)-Ga(1)-S(7)  | 122.1(2) | Mn(6)-S(6)       | 2.516(7)  |
| S(8)-Ga(1)-S(5)  | 117.0(2) | Mn(6)-S(6)#3     | 2.516(7)  |
| S(7)-Ga(1)-S(5)  | 97.2(2)  | Mn(6)-S(7)#8     | 2.588(6)  |
| S(8)-Ga(1)-S(3)  | 112.6(2) | Mn(6)-S(7)#10    | 2.588(6)  |
| S(7)-Ga(1)-S(3)  | 98.8(2)  | Mn(6)-S(2)#8     | 2.657(8)  |
| S(5)-Ga(1)-S(3)  | 106.4(3) | Mn(6)-S(3)#8     | 2.730(9)  |
| S(6)-Ga(2)-S(11) | 126.6(3) | S(2)-Mn(2)-S(11) | 83.2(2)   |

|                                                |           |                                                |            |
|------------------------------------------------|-----------|------------------------------------------------|------------|
| S(6)-Ga(2)-S(9)                                | 114.0(3)  | S(4) <sup>#4</sup> -Mn(2)-S(11)                | 78.4(2)    |
| S(11)-Ga(2)-S(9)                               | 98.4(3)   | S(11) <sup>#3</sup> -Mn(2)-S(11)               | 86.4(3)    |
| S(6)-Ga(2)-S(2)                                | 109.7(3)  | S(10) <sup>#3</sup> -Mn(2)-Ca(3)               | 51.13(15)  |
| S(11)-Ga(2)-S(2)                               | 100.2(3)  | S(10)-Mn(2)-Ca(3)                              | 51.13(15)  |
| S(9)-Ga(2)-S(2)                                | 105.5(3)  | S(2)-Mn(2)-Ca(3)                               | 138.1(2)   |
| S(10)-Ga(3)-S(7)                               | 114.6(2)  | S(4) <sup>#4</sup> -Mn(2)-Ca(3)                | 67.29(19)  |
| S(10)-Ga(3)-S(1) <sup>#1</sup>                 | 113.3(2)  | S(11) <sup>#3</sup> -Mn(2)-Ca(3)               | 124.68(18) |
| S(7)-Ga(3)-S(1) <sup>#1</sup>                  | 104.7(2)  | S(11)-Mn(2)-Ca(3)                              | 124.68(18) |
| S(10)-Ga(3)-S(4)                               | 109.3(2)  | S(8) <sup>#3</sup> -Mn(3)-S(8)                 | 91.1(3)    |
| S(7)-Ga(3)-S(4)                                | 106.8(2)  | S(8) <sup>#3</sup> -Mn(3)-S(11) <sup>#5</sup>  | 89.22(16)  |
| S(1) <sup>#1</sup> -Ga(3)-S(4)                 | 107.7(3)  | S(8)-Mn(3)-S(11) <sup>#5</sup>                 | 176.5(3)   |
| S(10)-Mn(1)-S(10) <sup>#2</sup>                | 95.9(3)   | S(8) <sup>#3</sup> -Mn(3)-S(11) <sup>#1</sup>  | 176.5(3)   |
| S(10)-Mn(1)-S(1)                               | 96.8(2)   | S(8)-Mn(3)-S(11) <sup>#1</sup>                 | 89.22(16)  |
| S(10) <sup>#2</sup> -Mn(1)-S(1)                | 96.8(2)   | S(11) <sup>#5</sup> -Mn(3)-S(11) <sup>#1</sup> | 90.2(3)    |
| S(10)-Mn(1)-S(9)                               | 102.2(2)  | S(8) <sup>#3</sup> -Mn(3)-S(3) <sup>#6</sup>   | 89.5(3)    |
| S(10) <sup>#2</sup> -Mn(1)-S(9)                | 102.2(2)  | S(8)-Mn(3)-S(3) <sup>#6</sup>                  | 89.5(3)    |
| S(1)-Mn(1)-S(9)                                | 151.3(3)  | S(11) <sup>#5</sup> -Mn(3)-S(3) <sup>#6</sup>  | 87.05(19)  |
| S(10)-Mn(1)-S(11) <sup>#2</sup>                | 173.8(2)  | S(11) <sup>#1</sup> -Mn(3)-S(3) <sup>#6</sup>  | 87.05(19)  |
| S(10) <sup>#2</sup> -Mn(1)-S(11) <sup>#2</sup> | 89.04(18) | S(8) <sup>#3</sup> -Mn(3)-S(4)                 | 103.1(3)   |
| S(1)-Mn(1)-S(11) <sup>#2</sup>                 | 78.85(19) | S(8)-Mn(3)-S(4)                                | 103.1(3)   |
| S(9)-Mn(1)-S(11) <sup>#2</sup>                 | 80.2(2)   | S(11) <sup>#5</sup> -Mn(3)-S(4)                | 80.1(2)    |
| S(10)-Mn(1)-S(11)                              | 89.05(18) | S(11) <sup>#1</sup> -Mn(3)-S(4)                | 80.1(2)    |
| S(10) <sup>#2</sup> -Mn(1)-S(11)               | 173.8(2)  | S(3) <sup>#6</sup> -Mn(3)-S(4)                 | 161.8(3)   |
| S(1)-Mn(1)-S(11)                               | 78.85(19) | S(8) <sup>#2</sup> -Mn(4)-S(8)                 | 95.0(3)    |
| S(9)-Mn(1)-S(11)                               | 80.2(2)   | S(8) <sup>#2</sup> -Mn(4)-S(5) <sup>#6</sup>   | 94.1(3)    |
| S(11) <sup>#2</sup> -Mn(1)-S(11)               | 85.7(3)   | S(8)-Mn(4)-S(5) <sup>#6</sup>                  | 94.1(3)    |
| S(10) <sup>#3</sup> -Mn(2)-S(10)               | 92.4(3)   | S(8) <sup>#2</sup> -Mn(4)-S(11) <sup>#1</sup>  | 176.6(3)   |
| S(10) <sup>#3</sup> -Mn(2)-S(2)                | 105.8(2)  | S(8)-Mn(4)-S(11) <sup>#1</sup>                 | 88.18(16)  |
| S(10)-Mn(2)-S(2)                               | 105.8(2)  | S(5) <sup>#6</sup> -Mn(4)-S(11) <sup>#1</sup>  | 87.00(19)  |
| S(10) <sup>#3</sup> -Mn(2)-S(4) <sup>#4</sup>  | 91.5(2)   | S(8) <sup>#2</sup> -Mn(4)-S(11) <sup>#7</sup>  | 88.18(16)  |
| S(10)-Mn(2)-S(4) <sup>#4</sup>                 | 91.5(2)   | S(8)-Mn(4)-S(11) <sup>#7</sup>                 | 176.6(3)   |
| S(2)-Mn(2)-S(4) <sup>#4</sup>                  | 154.6(3)  | S(5) <sup>#6</sup> -Mn(4)-S(11) <sup>#7</sup>  | 87.00(19)  |
| S(10) <sup>#3</sup> -Mn(2)-S(11) <sup>#3</sup> | 89.75(18) | S(11) <sup>#1</sup> -Mn(4)-S(11) <sup>#7</sup> | 88.6(3)    |
| S(10)-Mn(2)-S(11) <sup>#3</sup>                | 169.8(2)  | S(8) <sup>#2</sup> -Mn(4)-S(1) <sup>#1</sup>   | 99.8(3)    |
| S(2)-Mn(2)-S(11) <sup>#3</sup>                 | 83.2(2)   | S(8)-Mn(4)-S(1) <sup>#1</sup>                  | 99.8(3)    |
| S(4) <sup>#4</sup> -Mn(2)-S(11) <sup>#3</sup>  | 78.4(2)   | S(5) <sup>#6</sup> -Mn(4)-S(1) <sup>#1</sup>   | 159.3(3)   |
| S(10) <sup>#3</sup> -Mn(2)-S(11)               | 169.8(2)  | S(11) <sup>#1</sup> -Mn(4)-S(1) <sup>#1</sup>  | 78.3(2)    |
| S(10)-Mn(2)-S(11)                              | 89.76(18) | S(11) <sup>#7</sup> -Mn(4)-S(1) <sup>#1</sup>  | 78.3(2)    |

---

|                       |           |                        |           |
|-----------------------|-----------|------------------------|-----------|
| S(6)-Mn(5)-S(6)#2     | 96.8(3)   | S(6)#3-Ca(1)-S(6)#12   | 133.81(7) |
| S(6)-Mn(5)-S(9)#8     | 95.9(2)   | S(6)#10-Ca(1)-S(6)#12  | 133.81(7) |
| S(6)#2-Mn(5)-S(9)#8   | 95.9(2)   | S(6)#11-Ca(1)-S(6)     | 133.81(7) |
| S(6)-Mn(5)-S(7)#9     | 176.2(2)  | S(6)#8-Ca(1)-S(6)      | 85.60(15) |
| S(6)#2-Mn(5)-S(7)#9   | 86.67(18) | S(6)#3-Ca(1)-S(6)      | 76.6(2)   |
| S(9)#8-Mn(5)-S(7)#9   | 85.4(2)   | S(6)#10-Ca(1)-S(6)     | 133.81(7) |
| S(6)-Mn(5)-S(7)#8     | 86.67(18) | S(6)#12-Ca(1)-S(6)     | 85.60(15) |
| S(6)#2-Mn(5)-S(7)#8   | 176.2(2)  | S(8)-Ca(2)-S(8)#13     | 133.74(7) |
| S(9)#8-Mn(5)-S(7)#8   | 85.4(2)   | S(8)-Ca(2)-S(8)#14     | 85.76(15) |
| S(7)#9-Mn(5)-S(7)#8   | 89.8(3)   | S(8)#13-Ca(2)-S(8)#14  | 133.74(7) |
| S(6)-Mn(5)-S(5)#8     | 98.6(2)   | S(8)-Ca(2)-S(8)#6      | 85.76(15) |
| S(6)#2-Mn(5)-S(5)#8   | 98.6(2)   | S(8)#13-Ca(2)-S(8)#6   | 76.4(2)   |
| S(9)#8-Mn(5)-S(5)#8   | 158.0(4)  | S(8)#14-Ca(2)-S(8)#6   | 85.76(15) |
| S(7)#9-Mn(5)-S(5)#8   | 79.11(19) | S(8)-Ca(2)-S(8)#15     | 133.74(7) |
| S(7)#8-Mn(5)-S(5)#8   | 79.11(19) | S(8)#13-Ca(2)-S(8)#15  | 85.76(15) |
| S(6)-Mn(6)-S(6)#3     | 92.8(3)   | S(8)#14-Ca(2)-S(8)#15  | 76.4(2)   |
| S(6)-Mn(6)-S(7)#8     | 87.57(18) | S(8)#6-Ca(2)-S(8)#15   | 133.74(7) |
| S(6)#3-Mn(6)-S(7)#8   | 174.9(3)  | S(8)-Ca(2)-S(8)#3      | 76.4(2)   |
| S(6)-Mn(6)-S(7)#10    | 174.9(3)  | S(8)#13-Ca(2)-S(8)#3   | 85.76(15) |
| S(6)#3-Mn(6)-S(7)#10  | 87.57(18) | S(8)#14-Ca(2)-S(8)#3   | 133.74(7) |
| S(7)#8-Mn(6)-S(7)#10  | 91.6(3)   | S(8)#6-Ca(2)-S(8)#3    | 133.74(7) |
| S(6)-Mn(6)-S(2)#8     | 90.4(2)   | S(8)#15-Ca(2)-S(8)#3   | 85.76(15) |
| S(6)#3-Mn(6)-S(2)#8   | 90.4(2)   | S(10)#5-Ca(3)-S(10)#3  | 85.61(14) |
| S(7)#8-Mn(6)-S(2)#8   | 84.6(2)   | S(10)#5-Ca(3)-S(10)#1  | 76.6(2)   |
| S(7)#10-Mn(6)-S(2)#8  | 84.6(2)   | S(10)#3-Ca(3)-S(10)#1  | 133.81(7) |
| S(6)-Mn(6)-S(3)#8     | 102.5(2)  | S(10)#5-Ca(3)-S(10)    | 133.81(7) |
| S(6)#3-Mn(6)-S(3)#8   | 102.5(2)  | S(10)#3-Ca(3)-S(10)    | 76.6(2)   |
| S(7)#8-Mn(6)-S(3)#8   | 82.3(2)   | S(10)#1-Ca(3)-S(10)    | 85.61(14) |
| S(7)#10-Mn(6)-S(3)#8  | 82.3(2)   | S(10)#5-Ca(3)-S(10)#16 | 85.61(14) |
| S(2)#8-Mn(6)-S(3)#8   | 161.2(4)  | S(10)#3-Ca(3)-S(10)#16 | 85.61(14) |
| S(6)#11-Ca(1)-S(6)#8  | 133.81(7) | S(10)#1-Ca(3)-S(10)#16 | 133.80(7) |
| S(6)#11-Ca(1)-S(6)#3  | 85.60(15) | S(10)-Ca(3)-S(10)#16   | 133.80(7) |
| S(6)#8-Ca(1)-S(6)#3   | 133.81(7) | S(10)#5-Ca(3)-S(10)#4  | 133.80(7) |
| S(6)#11-Ca(1)-S(6)#10 | 85.60(15) | S(10)#3-Ca(3)-S(10)#4  | 133.80(7) |
| S(6)#8-Ca(1)-S(6)#10  | 76.6(2)   | S(10)#1-Ca(3)-S(10)#4  | 85.61(14) |
| S(6)#3-Ca(1)-S(6)#10  | 85.60(15) | S(10)-Ca(3)-S(10)#4    | 85.61(14) |
| S(6)#11-Ca(1)-S(6)#12 | 76.6(2)   | S(10)#16-Ca(3)-S(10)#4 | 76.6(2)   |
| S(6)#8-Ca(1)-S(6)#12  | 85.60(15) |                        |           |

---

---

Symmetry transformations used to generate equivalent atoms:

#1  $-y+1, x-y+1, z$  #2  $x, y, -z$  #3  $x, y, -z+1$  #4  $-x+y, -x+1, z$

#5  $-y+1, x-y+1, -z+1$  #6  $-x+y+1, -x+1, z$  #7  $-y+1, x-y+1, -z$

#8  $-y, x-y, z$  #9  $-y, x-y, -z$  #10  $-y, x-y, -z+1$

#11  $-x+y, -x, -z+1$  #12  $-x+y, -x, z$  #13  $-x+y+1, -x+1, -z+1$

#14  $-y+1, x-y, z$  #15  $-y+1, x-y, -z+1$  #16  $-x+y, -x+1, -z+1$

#17  $-x+y, -x+1, -z$

---



**Table S4b.** Selected distances (Å) and angles (degrees) for SrMn6Ga6S16.

|               |          |                |          |
|---------------|----------|----------------|----------|
| Sr(1)-S(6)#1  | 3.039(4) | Ga(3)-S(3)     | 2.308(4) |
| Sr(1)-S(6)#2  | 3.039(4) | Ga(3)-S(4)     | 2.327(4) |
| Sr(1)-S(6)    | 3.039(4) | Mn(1)-S(5)#4   | 2.518(5) |
| Sr(1)-S(6)#3  | 3.039(4) | Mn(1)-S(5)     | 2.518(5) |
| Sr(1)-S(6)#4  | 3.039(4) | Mn(1)-S(2)#4   | 2.582(5) |
| Sr(1)-S(6)#5  | 3.039(4) | Mn(1)-S(2)     | 2.582(5) |
| Sr(1)-S(4)#2  | 3.669(6) | Mn(1)-S(9)#10  | 2.703(6) |
| Sr(1)-S(4)#5  | 3.669(6) | Mn(1)-S(4)     | 2.755(7) |
| Sr(1)-S(4)    | 3.669(6) | Mn(2)-S(5)#14  | 2.501(4) |
| Sr(2)-S(11)   | 3.028(4) | Mn(2)-S(5)     | 2.501(4) |
| Sr(2)-S(11)#4 | 3.028(4) | Mn(2)-S(10)#10 | 2.598(6) |
| Sr(2)-S(11)#6 | 3.028(4) | Mn(2)-S(2)     | 2.611(5) |
| Sr(2)-S(11)#7 | 3.028(4) | Mn(2)-S(2)#14  | 2.611(5) |
| Sr(2)-S(11)#8 | 3.028(4) | Mn(2)-S(3)     | 2.818(7) |
| Sr(2)-S(11)#9 | 3.028(4) | Mn(3)-S(6)#4   | 2.544(4) |
| Sr(2)-S(7)    | 3.662(5) | Mn(3)-S(6)     | 2.544(4) |
| Sr(2)-S(7)#8  | 3.662(5) | Mn(3)-S(1)#2   | 2.611(5) |
| Sr(2)-S(7)#6  | 3.662(5) | Mn(3)-S(1)#1   | 2.611(5) |
| Sr(3)-S(5)    | 3.032(4) | Mn(3)-S(4)#2   | 2.679(6) |
| Sr(3)-S(5)#10 | 3.032(4) | Mn(3)-S(7)     | 2.699(6) |
| Sr(3)-S(5)#11 | 3.032(4) | Mn(4)-S(11)    | 2.522(4) |
| Sr(3)-S(5)#12 | 3.032(4) | Mn(4)-S(11)#4  | 2.522(4) |
| Sr(3)-S(5)#13 | 3.032(4) | Mn(4)-S(9)#10  | 2.651(6) |
| Sr(3)-S(5)#4  | 3.032(4) | Mn(4)-S(7)#6   | 2.697(6) |
| Sr(3)-S(9)    | 3.644(5) | Mn(4)-S(1)#12  | 2.707(5) |
| Sr(3)-S(9)#13 | 3.644(5) | Mn(4)-S(1)#10  | 2.707(5) |
| Sr(3)-S(9)#10 | 3.644(5) | Mn(5)-S(6)#14  | 2.531(4) |
| Ga(1)-S(5)    | 2.224(4) | Mn(5)-S(6)     | 2.531(4) |
| Ga(1)-S(1)    | 2.269(4) | Mn(5)-S(3)#2   | 2.602(6) |
| Ga(1)-S(10)   | 2.321(4) | Mn(5)-S(1)#15  | 2.653(5) |
| Ga(1)-S(9)    | 2.338(3) | Mn(5)-S(1)#2   | 2.653(5) |
| Ga(2)-S(11)   | 2.235(4) | Mn(5)-S(8)     | 2.728(6) |
| Ga(2)-S(2)    | 2.284(4) | Mn(6)-S(11)    | 2.514(4) |
| Ga(2)-S(8)    | 2.298(3) | Mn(6)-S(11)#14 | 2.514(4) |
| Ga(2)-S(7)    | 2.306(3) | Mn(6)-S(8)#6   | 2.628(6) |
| Ga(3)-S(6)    | 2.219(4) | Mn(6)-S(10)#10 | 2.680(6) |
| Ga(3)-S(2)    | 2.299(3) | Mn(6)-S(1)#10  | 2.723(5) |

---

|                     |            |                       |            |
|---------------------|------------|-----------------------|------------|
| Mn(6)-S(1)#16       | 2.723(5)   | S(11)-Sr(2)-S(11)#6   | 86.80(10)  |
| S(6)#1-Sr(1)-S(6)#2 | 74.55(14)  | S(11)#4-Sr(2)-S(11)#6 | 133.26(5)  |
| S(6)#1-Sr(1)-S(6)   | 133.11(5)  | S(11)-Sr(2)-S(11)#7   | 133.26(5)  |
| S(6)#2-Sr(1)-S(6)   | 87.12(10)  | S(11)#4-Sr(2)-S(11)#7 | 86.80(10)  |
| S(6)#1-Sr(1)-S(6)#3 | 87.12(10)  | S(11)#6-Sr(2)-S(11)#7 | 133.26(5)  |
| S(6)#2-Sr(1)-S(6)#3 | 133.11(5)  | S(11)-Sr(2)-S(11)#8   | 86.80(10)  |
| S(6)-Sr(1)-S(6)#3   | 133.11(5)  | S(11)#4-Sr(2)-S(11)#8 | 133.26(5)  |
| S(6)#1-Sr(1)-S(6)#4 | 87.12(10)  | S(11)#6-Sr(2)-S(11)#8 | 86.80(10)  |
| S(6)#2-Sr(1)-S(6)#4 | 133.11(5)  | S(11)#7-Sr(2)-S(11)#8 | 75.00(14)  |
| S(6)-Sr(1)-S(6)#4   | 74.55(14)  | S(11)-Sr(2)-S(11)#9   | 133.26(5)  |
| S(6)#3-Sr(1)-S(6)#4 | 87.12(10)  | S(11)#4-Sr(2)-S(11)#9 | 86.80(10)  |
| S(6)#1-Sr(1)-S(6)#5 | 133.11(5)  | S(11)#6-Sr(2)-S(11)#9 | 75.00(14)  |
| S(6)#2-Sr(1)-S(6)#5 | 87.12(10)  | S(11)#7-Sr(2)-S(11)#9 | 86.80(10)  |
| S(6)-Sr(1)-S(6)#5   | 87.12(10)  | S(11)#8-Sr(2)-S(11)#9 | 133.26(5)  |
| S(6)#3-Sr(1)-S(6)#5 | 74.55(14)  | S(11)-Sr(2)-S(7)      | 66.42(10)  |
| S(6)#4-Sr(1)-S(6)#5 | 133.11(5)  | S(11)#4-Sr(2)-S(7)    | 66.42(10)  |
| S(6)#1-Sr(1)-S(4)#2 | 67.87(9)   | S(11)#6-Sr(2)-S(7)    | 142.50(7)  |
| S(6)#2-Sr(1)-S(4)#2 | 67.87(9)   | S(11)#7-Sr(2)-S(7)    | 66.84(10)  |
| S(6)-Sr(1)-S(4)#2   | 65.26(9)   | S(11)#8-Sr(2)-S(7)    | 66.84(10)  |
| S(6)#3-Sr(1)-S(4)#2 | 142.69(7)  | S(11)#9-Sr(2)-S(7)    | 142.50(7)  |
| S(6)#4-Sr(1)-S(4)#2 | 65.26(9)   | S(11)-Sr(2)-S(7)#8    | 142.50(7)  |
| S(6)#5-Sr(1)-S(4)#2 | 142.69(7)  | S(11)#4-Sr(2)-S(7)#8  | 142.50(7)  |
| S(6)#1-Sr(1)-S(4)#5 | 65.26(9)   | S(11)#6-Sr(2)-S(7)#8  | 66.84(10)  |
| S(6)#2-Sr(1)-S(4)#5 | 65.26(10)  | S(11)#7-Sr(2)-S(7)#8  | 66.42(10)  |
| S(6)-Sr(1)-S(4)#5   | 142.69(7)  | S(11)#8-Sr(2)-S(7)#8  | 66.42(10)  |
| S(6)#3-Sr(1)-S(4)#5 | 67.86(9)   | S(11)#9-Sr(2)-S(7)#8  | 66.84(10)  |
| S(6)#4-Sr(1)-S(4)#5 | 142.69(7)  | S(7)-Sr(2)-S(7)#8     | 120        |
| S(6)#5-Sr(1)-S(4)#5 | 67.86(9)   | S(11)-Sr(2)-S(7)#6    | 66.84(10)  |
| S(4)#2-Sr(1)-S(4)#5 | 120        | S(11)#4-Sr(2)-S(7)#6  | 66.84(10)  |
| S(6)#1-Sr(1)-S(4)   | 142.69(7)  | S(11)#6-Sr(2)-S(7)#6  | 66.42(10)  |
| S(6)#2-Sr(1)-S(4)   | 142.69(7)  | S(11)#7-Sr(2)-S(7)#6  | 142.50(7)  |
| S(6)-Sr(1)-S(4)     | 67.86(9)   | S(11)#8-Sr(2)-S(7)#6  | 142.50(7)  |
| S(6)#3-Sr(1)-S(4)   | 65.26(9)   | S(11)#9-Sr(2)-S(7)#6  | 66.42(10)  |
| S(6)#4-Sr(1)-S(4)   | 67.86(9)   | S(7)-Sr(2)-S(7)#6     | 120.000(1) |
| S(6)#5-Sr(1)-S(4)   | 65.26(9)   | S(7)#8-Sr(2)-S(7)#6   | 120.000(1) |
| S(4)#2-Sr(1)-S(4)   | 119.999(1) | S(5)-Sr(3)-S(5)#10    | 86.72(11)  |
| S(4)#5-Sr(1)-S(4)   | 119.999(1) | S(5)-Sr(3)-S(5)#11    | 133.29(5)  |
| S(11)-Sr(2)-S(11)#4 | 75.00(14)  | S(5)#10-Sr(3)-S(5)#11 | 133.29(5)  |

---

---

|                       |            |                        |            |
|-----------------------|------------|------------------------|------------|
| S(5)-Sr(3)-S(5)#12    | 133.29(5)  | S(10)-Ga(1)-S(9)       | 105.72(17) |
| S(5)#10-Sr(3)-S(5)#12 | 75.11(15)  | S(11)-Ga(2)-S(2)       | 112.62(14) |
| S(5)#11-Sr(3)-S(5)#12 | 86.72(11)  | S(11)-Ga(2)-S(8)       | 113.44(17) |
| S(5)-Sr(3)-S(5)#13    | 86.72(11)  | S(2)-Ga(2)-S(8)        | 105.79(18) |
| S(5)#10-Sr(3)-S(5)#13 | 86.72(11)  | S(11)-Ga(2)-S(7)       | 109.23(17) |
| S(5)#11-Sr(3)-S(5)#13 | 75.11(15)  | S(2)-Ga(2)-S(7)        | 107.96(19) |
| S(5)#12-Sr(3)-S(5)#13 | 133.29(5)  | S(8)-Ga(2)-S(7)        | 107.53(17) |
| S(5)-Sr(3)-S(5)#4     | 75.11(15)  | S(6)-Ga(3)-S(2)        | 120.35(15) |
| S(5)#10-Sr(3)-S(5)#4  | 133.29(5)  | S(6)-Ga(3)-S(3)        | 117.26(17) |
| S(5)#11-Sr(3)-S(5)#4  | 86.72(11)  | S(2)-Ga(3)-S(3)        | 98.31(19)  |
| S(5)#12-Sr(3)-S(5)#4  | 86.72(11)  | S(6)-Ga(3)-S(4)        | 112.49(17) |
| S(5)#13-Sr(3)-S(5)#4  | 133.29(5)  | S(2)-Ga(3)-S(4)        | 99.51(19)  |
| S(5)-Sr(3)-S(9)       | 67.24(10)  | S(3)-Ga(3)-S(4)        | 106.47(17) |
| S(5)#10-Sr(3)-S(9)    | 142.44(7)  | S(5)#4-Mn(1)-S(5)      | 94.4(2)    |
| S(5)#11-Sr(3)-S(9)    | 66.06(10)  | S(5)#4-Mn(1)-S(2)#4    | 86.69(13)  |
| S(5)#12-Sr(3)-S(9)    | 142.44(7)  | S(5)-Mn(1)-S(2)#4      | 174.52(19) |
| S(5)#13-Sr(3)-S(9)    | 66.06(10)  | S(5)#4-Mn(1)-S(2)      | 174.52(19) |
| S(5)#4-Sr(3)-S(9)     | 67.24(10)  | S(5)-Mn(1)-S(2)        | 86.69(13)  |
| S(5)-Sr(3)-S(9)#13    | 142.44(7)  | S(2)#4-Mn(1)-S(2)      | 91.7(2)    |
| S(5)#10-Sr(3)-S(9)#13 | 66.06(10)  | S(5)#4-Mn(1)-S(9)#10   | 89.41(15)  |
| S(5)#11-Sr(3)-S(9)#13 | 67.24(10)  | S(5)-Mn(1)-S(9)#10     | 89.41(15)  |
| S(5)#12-Sr(3)-S(9)#13 | 66.06(10)  | S(2)#4-Mn(1)-S(9)#10   | 85.24(14)  |
| S(5)#13-Sr(3)-S(9)#13 | 67.24(10)  | S(2)-Mn(1)-S(9)#10     | 85.24(14)  |
| S(5)#4-Sr(3)-S(9)#13  | 142.44(7)  | S(5)#4-Mn(1)-S(4)      | 102.17(15) |
| S(9)-Sr(3)-S(9)#13    | 120.000(1) | S(5)-Mn(1)-S(4)        | 102.17(15) |
| S(5)-Sr(3)-S(9)#10    | 66.06(10)  | S(2)#4-Mn(1)-S(4)      | 82.80(13)  |
| S(5)#10-Sr(3)-S(9)#10 | 67.24(10)  | S(2)-Mn(1)-S(4)        | 82.80(13)  |
| S(5)#11-Sr(3)-S(9)#10 | 142.44(7)  | S(9)#10-Mn(1)-S(4)     | 162.8(2)   |
| S(5)#12-Sr(3)-S(9)#10 | 67.24(10)  | S(5)#14-Mn(2)-S(5)     | 96.3(2)    |
| S(5)#13-Sr(3)-S(9)#10 | 142.44(7)  | S(5)#14-Mn(2)-S(10)#10 | 95.42(15)  |
| S(5)#4-Sr(3)-S(9)#10  | 66.06(10)  | S(5)-Mn(2)-S(10)#10    | 95.42(15)  |
| S(9)-Sr(3)-S(9)#10    | 120        | S(5)#14-Mn(2)-S(2)     | 176.55(18) |
| S(9)#13-Sr(3)-S(9)#10 | 120        | S(5)-Mn(2)-S(2)        | 86.40(13)  |
| S(5)-Ga(1)-S(1)       | 125.08(16) | S(10)#10-Mn(2)-S(2)    | 86.43(14)  |
| S(5)-Ga(1)-S(10)      | 113.89(18) | S(5)#14-Mn(2)-S(2)#14  | 86.40(13)  |
| S(1)-Ga(1)-S(10)      | 99.3(2)    | S(5)-Mn(2)-S(2)#14     | 176.55(18) |
| S(5)-Ga(1)-S(9)       | 109.74(18) | S(10)#10-Mn(2)-S(2)#14 | 86.43(14)  |
| S(1)-Ga(1)-S(9)       | 101.00(19) | S(2)-Mn(2)-S(2)#14     | 90.8(2)    |

---

|                                                |            |                                                  |            |
|------------------------------------------------|------------|--------------------------------------------------|------------|
| S(5) <sup>#14</sup> -Mn(2)-S(3)                | 97.71(15)  | S(7) <sup>#6</sup> -Mn(4)-S(1) <sup>#10</sup>    | 78.78(13)  |
| S(5)-Mn(2)-S(3)                                | 97.71(15)  | S(1) <sup>#12</sup> -Mn(4)-S(1) <sup>#10</sup>   | 86.4(2)    |
| S(10) <sup>#10</sup> -Mn(2)-S(3)               | 160.3(2)   | S(11)-Mn(4)-Sr(2)                                | 52.09(11)  |
| S(2)-Mn(2)-S(3)                                | 79.77(12)  | S(6) <sup>#14</sup> -Mn(5)-S(3) <sup>#2</sup>    | 93.92(16)  |
| S(2) <sup>#14</sup> -Mn(2)-S(3)                | 79.77(12)  | S(6)-Mn(5)-S(3) <sup>#2</sup>                    | 93.92(16)  |
| S(6) <sup>#4</sup> -Mn(3)-S(6)                 | 92.7(2)    | S(6) <sup>#14</sup> -Mn(5)-S(1) <sup>#15</sup>   | 87.77(13)  |
| S(6) <sup>#4</sup> -Mn(3)-S(1) <sup>#2</sup>   | 176.45(19) | S(6)-Mn(5)-S(1) <sup>#15</sup>                   | 176.18(19) |
| S(6)-Mn(3)-S(1) <sup>#2</sup>                  | 88.39(13)  | S(3) <sup>#2</sup> -Mn(5)-S(1) <sup>#15</sup>    | 88.03(15)  |
| S(6) <sup>#4</sup> -Mn(3)-S(1) <sup>#1</sup>   | 88.39(13)  | S(6) <sup>#14</sup> -Mn(5)-S(1) <sup>#2</sup>    | 176.18(19) |
| S(6)-Mn(3)-S(1) <sup>#1</sup>                  | 176.45(19) | S(6)-Mn(5)-S(1) <sup>#2</sup>                    | 87.77(13)  |
| S(1) <sup>#2</sup> -Mn(3)-S(1) <sup>#1</sup>   | 90.4(2)    | S(3) <sup>#2</sup> -Mn(5)-S(1) <sup>#2</sup>     | 88.03(15)  |
| S(6) <sup>#4</sup> -Mn(3)-S(4) <sup>#2</sup>   | 88.78(16)  | S(1) <sup>#15</sup> -Mn(5)-S(1) <sup>#2</sup>    | 89.0(2)    |
| S(6)-Mn(3)-S(4) <sup>#2</sup>                  | 88.78(16)  | S(6) <sup>#14</sup> -Mn(5)-S(8)                  | 98.67(15)  |
| S(1) <sup>#2</sup> -Mn(3)-S(4) <sup>#2</sup>   | 87.85(15)  | S(6)-Mn(5)-S(8)                                  | 98.67(15)  |
| S(1) <sup>#1</sup> -Mn(3)-S(4) <sup>#2</sup>   | 87.85(15)  | S(3) <sup>#2</sup> -Mn(5)-S(8)                   | 161.2(2)   |
| S(6) <sup>#4</sup> -Mn(3)-S(7)                 | 102.64(15) | S(1) <sup>#15</sup> -Mn(5)-S(8)                  | 78.66(14)  |
| S(6)-Mn(3)-S(7)                                | 102.64(15) | S(1) <sup>#2</sup> -Mn(5)-S(8)                   | 78.66(14)  |
| S(1) <sup>#2</sup> -Mn(3)-S(7)                 | 80.42(15)  | S(11)-Mn(6)-S(11) <sup>#14</sup>                 | 96.0(2)    |
| S(1) <sup>#1</sup> -Mn(3)-S(7)                 | 80.42(15)  | S(11)-Mn(6)-S(8) <sup>#6</sup>                   | 96.55(15)  |
| S(4) <sup>#2</sup> -Mn(3)-S(7)                 | 163.3(2)   | S(11) <sup>#14</sup> -Mn(6)-S(8) <sup>#6</sup>   | 96.55(15)  |
| S(11)-Mn(4)-S(11) <sup>#4</sup>                | 93.9(2)    | S(11)-Mn(6)-S(10) <sup>#10</sup>                 | 101.88(16) |
| S(11)-Mn(4)-S(9) <sup>#10</sup>                | 105.83(15) | S(11) <sup>#14</sup> -Mn(6)-S(10) <sup>#10</sup> | 101.88(16) |
| S(11) <sup>#4</sup> -Mn(4)-S(9) <sup>#10</sup> | 105.83(15) | S(8) <sup>#6</sup> -Mn(6)-S(10) <sup>#10</sup>   | 152.3(2)   |
| S(11)-Mn(4)-S(7) <sup>#6</sup>                 | 90.94(15)  | S(11)-Mn(6)-S(1) <sup>#10</sup>                  | 88.81(14)  |
| S(11) <sup>#4</sup> -Mn(4)-S(7) <sup>#6</sup>  | 90.94(15)  | S(11) <sup>#14</sup> -Mn(6)-S(1) <sup>#10</sup>  | 173.91(16) |
| S(9) <sup>#10</sup> -Mn(4)-S(7) <sup>#6</sup>  | 155.1(2)   | S(8) <sup>#6</sup> -Mn(6)-S(1) <sup>#10</sup>    | 79.17(13)  |
| S(11)-Mn(4)-S(1) <sup>#12</sup>                | 169.37(18) | S(10) <sup>#10</sup> -Mn(6)-S(1) <sup>#10</sup>  | 80.66(14)  |
| S(11) <sup>#4</sup> -Mn(4)-S(1) <sup>#12</sup> | 89.00(14)  | S(11)-Mn(6)-S(1) <sup>#16</sup>                  | 173.91(16) |
| S(9) <sup>#10</sup> -Mn(4)-S(1) <sup>#12</sup> | 83.12(14)  | S(11) <sup>#14</sup> -Mn(6)-S(1) <sup>#16</sup>  | 88.81(14)  |
| S(7) <sup>#6</sup> -Mn(4)-S(1) <sup>#12</sup>  | 78.78(13)  | S(8) <sup>#6</sup> -Mn(6)-S(1) <sup>#16</sup>    | 79.17(13)  |
| S(11)-Mn(4)-S(1) <sup>#10</sup>                | 89.00(14)  | S(10) <sup>#10</sup> -Mn(6)-S(1) <sup>#16</sup>  | 80.66(14)  |
| S(11) <sup>#4</sup> -Mn(4)-S(1) <sup>#10</sup> | 169.37(18) | S(1) <sup>#10</sup> -Mn(6)-S(1) <sup>#16</sup>   | 86.1(2)    |
| S(9) <sup>#10</sup> -Mn(4)-S(1) <sup>#10</sup> | 83.12(14)  |                                                  |            |

Symmetry transformations used to generate equivalent atoms:

#1 -y+1,x-y,-z+2 #2 -y+1,x-y,z #3 -x+y+1,-x+1,-z+2  
#4 x,y,-z+2 #5 -x+y+1,-x+1,z #6 -y,x-y,z  
#7 -x+y,-x,-z+2 #8 -x+y,-x,z #9 -y,x-y,-z+2  
#10 -x+y,-x+1,z #11 -y+1,x-y+1,-z+2 #12 -x+y,-x+1,-z+2

---

#13  $-y+1, x-y+1, z$  #14  $x, y, -z+1$  #15  $-y+1, x-y, -z+1$

#16  $-x+y, -x+1, -z+1$

---

**Table S4c.** Selected distances (Å) and angles (degrees) for BaMn6Ga6S16.

|                 |          |                |           |
|-----------------|----------|----------------|-----------|
| Ba(1)-S(7)      | 3.149(4) | Ba(3)-S(10)#16 | 3.659(5)  |
| Ba(1)-S(7)#1    | 3.149(4) | Ba(3)-S(10)    | 3.659(5)  |
| Ba(1)-S(7)#2    | 3.149(4) | Ba(3A)-S(2)#21 | 3.143(3)  |
| Ba(1)-S(7)#3    | 3.149(4) | Ba(3A)-S(2)#13 | 3.143(3)  |
| Ba(1)-S(7)#4    | 3.149(4) | Ba(3A)-S(2)#10 | 3.143(3)  |
| Ba(1)-S(7)#5    | 3.149(4) | Ba(3A)-S(2)#22 | 3.143(3)  |
| Ba(1)-S(5)#2    | 3.675(5) | Ba(3A)-S(2)    | 3.143(3)  |
| Ba(1)-S(5)#4    | 3.675(5) | Ba(3A)-S(2)#5  | 3.143(3)  |
| Ba(1)-S(5)      | 3.675(5) | Ga(1)-S(2)     | 2.223(4)  |
| Ba(1A)-S(7)     | 3.139(4) | Ga(1)-S(4)     | 2.298(3)  |
| Ba(1A)-S(7)#7   | 3.139(4) | Ga(1)-S(3)     | 2.320(5)  |
| Ba(1A)-S(7)#2   | 3.139(4) | Ga(1)-S(1)     | 2.322(5)  |
| Ba(1A)-S(7)#4   | 3.139(4) | Ga(2)-S(7)     | 2.234(4)  |
| Ba(1A)-S(7)#8   | 3.139(4) | Ga(2)-S(4)     | 2.287(3)  |
| Ba(1A)-S(7)#9   | 3.139(4) | Ga(2)-S(8)#4   | 2.301(5)  |
| Ba(2)-S(2)      | 3.157(3) | Ga(2)-S(5)     | 2.314(6)  |
| Ba(2)-S(2)#10   | 3.157(3) | Ga(3)-S(11)    | 2.225(4)  |
| Ba(2)-S(2)#11   | 3.157(3) | Ga(3)-S(6)     | 2.260(4)  |
| Ba(2)-S(2)#12   | 3.157(3) | Ga(3)-S(10)    | 2.326(4)  |
| Ba(2)-S(2)#13   | 3.157(3) | Ga(3)-S(9)     | 2.328(4)  |
| Ba(2)-S(2)#8    | 3.157(3) | Mn(1)-S(2)#8   | 2.527(3)  |
| Ba(2)-S(1)#13   | 3.654(4) | Mn(1)-S(2)     | 2.527(3)  |
| Ba(2)-S(1)      | 3.654(4) | Mn(1)-S(6)#4   | 2.632(6)  |
| Ba(2)-S(1)#10   | 3.654(4) | Mn(1)-S(6)#9   | 2.632(6)  |
| Ba(2A)-S(11)#5  | 3.146(3) | Mn(1)-S(8)#4   | 2.653(7)  |
| Ba(2A)-S(11)    | 3.146(3) | Mn(1)-S(1)#10  | 2.719(9)  |
| Ba(2A)-S(11)#15 | 3.146(3) | Mn(2)-S(7)#5   | 2.505(4)  |
| Ba(2A)-S(11)#16 | 3.146(3) | Mn(2)-S(7)     | 2.505(4)  |
| Ba(2A)-S(11)#17 | 3.146(3) | Mn(2)-S(9)     | 2.607(5)  |
| Ba(2A)-S(11)#18 | 3.146(3) | Mn(2)-S(5)#2   | 2.707(10) |
| Ba(3)-S(11)#8   | 3.140(3) | Mn(2)-S(6)#5   | 2.723(6)  |
| Ba(3)-S(11)     | 3.140(3) | Mn(2)-S(6)     | 2.723(6)  |
| Ba(3)-S(11)#16  | 3.140(3) | Mn(3)-S(7)     | 2.495(4)  |
| Ba(3)-S(11)#19  | 3.140(3) | Mn(3)-S(7)#8   | 2.495(4)  |
| Ba(3)-S(11)#20  | 3.140(3) | Mn(3)-S(8)     | 2.685(10) |
| Ba(3)-S(11)#17  | 3.140(3) | Mn(3)-S(6)#8   | 2.707(6)  |
| Ba(3)-S(10)#17  | 3.659(5) | Mn(3)-S(6)     | 2.707(6)  |

---

|                                              |           |                                                |            |
|----------------------------------------------|-----------|------------------------------------------------|------------|
| Mn(3)-S(10)                                  | 2.744(6)  | S(7) <sup>#4</sup> -Ba(1)-S(5) <sup>#2</sup>   | 143.60(6)  |
| Mn(4)-S(2) <sup>#22</sup>                    | 2.506(3)  | S(7) <sup>#5</sup> -Ba(1)-S(5) <sup>#2</sup>   | 66.61(13)  |
| Mn(4)-S(2) <sup>#13</sup>                    | 2.506(3)  | S(7)-Ba(1)-S(5) <sup>#4</sup>                  | 143.60(6)  |
| Mn(4)-S(3)                                   | 2.617(9)  | S(7) <sup>#1</sup> -Ba(1)-S(5) <sup>#4</sup>   | 66.61(13)  |
| Mn(4)-S(6) <sup>#16</sup>                    | 2.640(6)  | S(7) <sup>#2</sup> -Ba(1)-S(5) <sup>#4</sup>   | 66.61(13)  |
| Mn(4)-S(6) <sup>#15</sup>                    | 2.640(6)  | S(7) <sup>#3</sup> -Ba(1)-S(5) <sup>#4</sup>   | 65.93(13)  |
| Mn(4)-S(5) <sup>#13</sup>                    | 2.840(7)  | S(7) <sup>#4</sup> -Ba(1)-S(5) <sup>#4</sup>   | 65.93(13)  |
| Mn(5)-S(11)                                  | 2.505(4)  | S(7) <sup>#5</sup> -Ba(1)-S(5) <sup>#4</sup>   | 143.60(6)  |
| Mn(5)-S(11) <sup>#8</sup>                    | 2.505(4)  | S(5) <sup>#2</sup> -Ba(1)-S(5) <sup>#4</sup>   | 120        |
| Mn(5)-S(4) <sup>#20</sup>                    | 2.573(6)  | S(7)-Ba(1)-S(5)                                | 65.93(13)  |
| Mn(5)-S(4) <sup>#17</sup>                    | 2.573(6)  | S(7) <sup>#1</sup> -Ba(1)-S(5)                 | 143.60(6)  |
| Mn(5)-S(10) <sup>#17</sup>                   | 2.744(7)  | S(7) <sup>#2</sup> -Ba(1)-S(5)                 | 143.60(6)  |
| Mn(5)-S(1) <sup>#17</sup>                    | 2.808(6)  | S(7) <sup>#3</sup> -Ba(1)-S(5)                 | 66.61(13)  |
| Mn(6)-S(11) <sup>#16</sup>                   | 2.481(4)  | S(7) <sup>#4</sup> -Ba(1)-S(5)                 | 66.61(13)  |
| Mn(6)-S(11) <sup>#15</sup>                   | 2.481(4)  | S(7) <sup>#5</sup> -Ba(1)-S(5)                 | 65.93(13)  |
| Mn(6)-S(4)                                   | 2.608(6)  | S(5) <sup>#2</sup> -Ba(1)-S(5)                 | 120.000(1) |
| Mn(6)-S(4) <sup>#5</sup>                     | 2.608(6)  | S(5) <sup>#4</sup> -Ba(1)-S(5)                 | 120.000(2) |
| Mn(6)-S(9)                                   | 2.649(6)  | S(7)-Ba(1A)-S(7) <sup>#7</sup>                 | 132.37(4)  |
| Mn(6)-S(3)                                   | 2.849(6)  | S(7)-Ba(1A)-S(7) <sup>#2</sup>                 | 88.75(8)   |
| S(7)-Ba(1)-S(7) <sup>#1</sup>                | 132.54(4) | S(7) <sup>#7</sup> -Ba(1A)-S(7) <sup>#2</sup>  | 72.29(11)  |
| S(7)-Ba(1)-S(7) <sup>#2</sup>                | 88.39(8)  | S(7)-Ba(1A)-S(7) <sup>#4</sup>                 | 88.75(8)   |
| S(7) <sup>#1</sup> -Ba(1)-S(7) <sup>#2</sup> | 72.80(11) | S(7) <sup>#7</sup> -Ba(1A)-S(7) <sup>#4</sup>  | 132.37(4)  |
| S(7)-Ba(1)-S(7) <sup>#3</sup>                | 132.54(4) | S(7) <sup>#2</sup> -Ba(1A)-S(7) <sup>#4</sup>  | 88.75(8)   |
| S(7) <sup>#1</sup> -Ba(1)-S(7) <sup>#3</sup> | 88.39(8)  | S(7)-Ba(1A)-S(7) <sup>#8</sup>                 | 72.29(11)  |
| S(7) <sup>#2</sup> -Ba(1)-S(7) <sup>#3</sup> | 132.54(4) | S(7) <sup>#7</sup> -Ba(1A)-S(7) <sup>#8</sup>  | 88.75(8)   |
| S(7)-Ba(1)-S(7) <sup>#4</sup>                | 88.39(8)  | S(7) <sup>#2</sup> -Ba(1A)-S(7) <sup>#8</sup>  | 132.37(4)  |
| S(7) <sup>#1</sup> -Ba(1)-S(7) <sup>#4</sup> | 132.54(4) | S(7) <sup>#4</sup> -Ba(1A)-S(7) <sup>#8</sup>  | 132.37(4)  |
| S(7) <sup>#2</sup> -Ba(1)-S(7) <sup>#4</sup> | 88.39(8)  | S(7)-Ba(1A)-S(7) <sup>#9</sup>                 | 132.37(4)  |
| S(7) <sup>#3</sup> -Ba(1)-S(7) <sup>#4</sup> | 72.80(11) | S(7) <sup>#7</sup> -Ba(1A)-S(7) <sup>#9</sup>  | 88.75(8)   |
| S(7)-Ba(1)-S(7) <sup>#5</sup>                | 72.80(11) | S(7) <sup>#2</sup> -Ba(1A)-S(7) <sup>#9</sup>  | 132.37(4)  |
| S(7) <sup>#1</sup> -Ba(1)-S(7) <sup>#5</sup> | 88.39(8)  | S(7) <sup>#4</sup> -Ba(1A)-S(7) <sup>#9</sup>  | 72.29(11)  |
| S(7) <sup>#2</sup> -Ba(1)-S(7) <sup>#5</sup> | 132.54(4) | S(7) <sup>#8</sup> -Ba(1A)-S(7) <sup>#9</sup>  | 88.75(8)   |
| S(7) <sup>#3</sup> -Ba(1)-S(7) <sup>#5</sup> | 88.39(8)  | S(2)-Ba(2)-S(2) <sup>#10</sup>                 | 88.42(8)   |
| S(7) <sup>#4</sup> -Ba(1)-S(7) <sup>#5</sup> | 132.54(4) | S(2)-Ba(2)-S(2) <sup>#11</sup>                 | 132.52(3)  |
| S(7)-Ba(1)-S(5) <sup>#2</sup>                | 66.61(13) | S(2) <sup>#10</sup> -Ba(2)-S(2) <sup>#11</sup> | 132.52(3)  |
| S(7) <sup>#1</sup> -Ba(1)-S(5) <sup>#2</sup> | 65.93(13) | S(2)-Ba(2)-S(2) <sup>#12</sup>                 | 132.52(3)  |
| S(7) <sup>#2</sup> -Ba(1)-S(5) <sup>#2</sup> | 65.93(13) | S(2) <sup>#10</sup> -Ba(2)-S(2) <sup>#12</sup> | 72.75(11)  |
| S(7) <sup>#3</sup> -Ba(1)-S(5) <sup>#2</sup> | 143.60(6) | S(2) <sup>#11</sup> -Ba(2)-S(2) <sup>#12</sup> | 88.42(8)   |

---

---

|                          |            |                          |           |
|--------------------------|------------|--------------------------|-----------|
| S(2)-Ba(2)-S(2)#13       | 88.42(8)   | S(11)#15-Ba(2A)-S(11)#17 | 132.51(3) |
| S(2)#10-Ba(2)-S(2)#13    | 88.42(8)   | S(11)#16-Ba(2A)-S(11)#17 | 88.44(7)  |
| S(2)#11-Ba(2)-S(2)#13    | 72.75(11)  | S(11)#5-Ba(2A)-S(11)#18  | 88.45(7)  |
| S(2)#12-Ba(2)-S(2)#13    | 132.52(3)  | S(11)-Ba(2A)-S(11)#18    | 132.51(3) |
| S(2)-Ba(2)-S(2)#8        | 72.75(11)  | S(11)#15-Ba(2A)-S(11)#18 | 88.44(7)  |
| S(2)#10-Ba(2)-S(2)#8     | 132.52(3)  | S(11)#16-Ba(2A)-S(11)#18 | 132.51(3) |
| S(2)#11-Ba(2)-S(2)#8     | 88.42(8)   | S(11)#17-Ba(2A)-S(11)#18 | 72.71(10) |
| S(2)#12-Ba(2)-S(2)#8     | 88.42(8)   | S(11)#8-Ba(3)-S(11)      | 72.44(11) |
| S(2)#13-Ba(2)-S(2)#8     | 132.52(3)  | S(11)#8-Ba(3)-S(11)#16   | 132.42(3) |
| S(2)-Ba(2)-S(1)#13       | 143.60(5)  | S(11)-Ba(3)-S(11)#16     | 88.64(8)  |
| S(2)#10-Ba(2)-S(1)#13    | 65.09(12)  | S(11)#8-Ba(3)-S(11)#19   | 88.64(8)  |
| S(2)#11-Ba(2)-S(1)#13    | 67.44(12)  | S(11)-Ba(3)-S(11)#19     | 132.42(3) |
| S(2)#12-Ba(2)-S(1)#13    | 65.09(12)  | S(11)#16-Ba(3)-S(11)#19  | 72.44(11) |
| S(2)#13-Ba(2)-S(1)#13    | 67.44(12)  | S(11)#8-Ba(3)-S(11)#20   | 88.64(8)  |
| S(2)#8-Ba(2)-S(1)#13     | 143.60(5)  | S(11)-Ba(3)-S(11)#20     | 132.42(3) |
| S(2)-Ba(2)-S(1)          | 67.44(12)  | S(11)#16-Ba(3)-S(11)#20  | 132.42(3) |
| S(2)#10-Ba(2)-S(1)       | 143.60(5)  | S(11)#19-Ba(3)-S(11)#20  | 88.64(8)  |
| S(2)#11-Ba(2)-S(1)       | 65.09(12)  | S(11)#8-Ba(3)-S(11)#17   | 132.42(3) |
| S(2)#12-Ba(2)-S(1)       | 143.60(5)  | S(11)-Ba(3)-S(11)#17     | 88.64(8)  |
| S(2)#13-Ba(2)-S(1)       | 65.09(12)  | S(11)#16-Ba(3)-S(11)#17  | 88.64(8)  |
| S(2)#8-Ba(2)-S(1)        | 67.44(12)  | S(11)#19-Ba(3)-S(11)#17  | 132.42(3) |
| S(1)#13-Ba(2)-S(1)       | 120.000(1) | S(11)#20-Ba(3)-S(11)#17  | 72.44(11) |
| S(2)-Ba(2)-S(1)#10       | 65.09(12)  | S(11)#8-Ba(3)-S(10)#17   | 65.93(10) |
| S(2)#10-Ba(2)-S(1)#10    | 67.44(12)  | S(11)-Ba(3)-S(10)#17     | 65.93(10) |
| S(2)#11-Ba(2)-S(1)#10    | 143.60(5)  | S(11)#16-Ba(3)-S(10)#17  | 143.78(5) |
| S(2)#12-Ba(2)-S(1)#10    | 67.44(12)  | S(11)#19-Ba(3)-S(10)#17  | 143.78(5) |
| S(2)#13-Ba(2)-S(1)#10    | 143.60(5)  | S(11)#20-Ba(3)-S(10)#17  | 66.49(10) |
| S(2)#8-Ba(2)-S(1)#10     | 65.09(12)  | S(11)#17-Ba(3)-S(10)#17  | 66.49(10) |
| S(1)#13-Ba(2)-S(1)#10    | 120        | S(11)#8-Ba(3)-S(10)#16   | 143.78(5) |
| S(1)-Ba(2)-S(1)#10       | 120        | S(11)-Ba(3)-S(10)#16     | 143.78(5) |
| S(11)#5-Ba(2A)-S(11)     | 72.71(10)  | S(11)#16-Ba(3)-S(10)#16  | 66.49(10) |
| S(11)#5-Ba(2A)-S(11)#15  | 88.45(7)   | S(11)#19-Ba(3)-S(10)#16  | 66.49(10) |
| S(11)-Ba(2A)-S(11)#15    | 132.51(3)  | S(11)#20-Ba(3)-S(10)#16  | 65.93(10) |
| S(11)#5-Ba(2A)-S(11)#16  | 132.51(3)  | S(11)#17-Ba(3)-S(10)#16  | 65.93(10) |
| S(11)-Ba(2A)-S(11)#16    | 88.45(7)   | S(10)#17-Ba(3)-S(10)#16  | 120       |
| S(11)#15-Ba(2A)-S(11)#16 | 72.71(10)  | S(11)#8-Ba(3)-S(10)      | 66.49(10) |
| S(11)#5-Ba(2A)-S(11)#17  | 132.51(3)  | S(11)-Ba(3)-S(10)        | 66.49(10) |
| S(11)-Ba(2A)-S(11)#17    | 88.45(7)   | S(11)#16-Ba(3)-S(10)     | 65.93(10) |

---



---

|                        |            |                      |            |
|------------------------|------------|----------------------|------------|
| S(11)#19-Ba(3)-S(10)   | 65.93(10)  | S(2)#8-Mn(1)-S(2)    | 95.58(16)  |
| S(11)#20-Ba(3)-S(10)   | 143.78(5)  | S(2)#8-Mn(1)-S(6)#4  | 176.12(17) |
| S(11)#17-Ba(3)-S(10)   | 143.78(5)  | S(2)-Mn(1)-S(6)#4    | 87.26(14)  |
| S(10)#17-Ba(3)-S(10)   | 120        | S(2)#8-Mn(1)-S(6)#9  | 87.26(14)  |
| S(10)#16-Ba(3)-S(10)   | 120        | S(2)-Mn(1)-S(6)#9    | 176.12(17) |
| S(2)#21-Ba(3A)-S(2)#13 | 132.29(3)  | S(6)#4-Mn(1)-S(6)#9  | 89.8(3)    |
| S(2)#21-Ba(3A)-S(2)#10 | 72.05(11)  | S(2)#8-Mn(1)-S(8)#4  | 100.44(17) |
| S(2)#13-Ba(3A)-S(2)#10 | 88.92(8)   | S(2)-Mn(1)-S(8)#4    | 100.44(17) |
| S(2)#21-Ba(3A)-S(2)#22 | 88.92(8)   | S(6)#4-Mn(1)-S(8)#4  | 81.60(17)  |
| S(2)#13-Ba(3A)-S(2)#22 | 72.05(11)  | S(6)#9-Mn(1)-S(8)#4  | 81.60(17)  |
| S(2)#10-Ba(3A)-S(2)#22 | 132.29(3)  | S(2)#8-Mn(1)-S(1)#10 | 89.25(12)  |
| S(2)#21-Ba(3A)-S(2)    | 132.30(3)  | S(2)-Mn(1)-S(1)#10   | 89.25(12)  |
| S(2)#13-Ba(3A)-S(2)    | 88.92(8)   | S(6)#4-Mn(1)-S(1)#10 | 88.14(12)  |
| S(2)#10-Ba(3A)-S(2)    | 88.92(8)   | S(6)#9-Mn(1)-S(1)#10 | 88.14(12)  |
| S(2)#22-Ba(3A)-S(2)    | 132.29(3)  | S(8)#4-Mn(1)-S(1)#10 | 165.5(2)   |
| S(2)#21-Ba(3A)-S(2)#5  | 88.92(8)   | S(7)#5-Mn(2)-S(7)    | 96.50(19)  |
| S(2)#13-Ba(3A)-S(2)#5  | 132.29(3)  | S(7)#5-Mn(2)-S(9)    | 103.86(14) |
| S(2)#10-Ba(3A)-S(2)#5  | 132.29(3)  | S(7)-Mn(2)-S(9)      | 103.86(14) |
| S(2)#22-Ba(3A)-S(2)#5  | 88.92(8)   | S(7)#5-Mn(2)-S(5)#2  | 92.66(13)  |
| S(2)-Ba(3A)-S(2)#5     | 72.05(11)  | S(7)-Mn(2)-S(5)#2    | 92.66(13)  |
| S(2)-Ga(1)-S(4)        | 118.06(14) | S(9)-Mn(2)-S(5)#2    | 154.9(2)   |
| S(2)-Ga(1)-S(3)        | 116.38(13) | S(7)#5-Mn(2)-S(6)#5  | 88.07(16)  |
| S(4)-Ga(1)-S(3)        | 99.4(2)    | S(7)-Mn(2)-S(6)#5    | 170.86(16) |
| S(2)-Ga(1)-S(1)        | 113.59(13) | S(9)-Mn(2)-S(6)#5    | 82.60(14)  |
| S(4)-Ga(1)-S(1)        | 100.7(2)   | S(5)#2-Mn(2)-S(6)#5  | 79.19(13)  |
| S(3)-Ga(1)-S(1)        | 106.61(16) | S(7)#5-Mn(2)-S(6)    | 170.86(16) |
| S(7)-Ga(2)-S(4)        | 110.12(14) | S(7)-Mn(2)-S(6)      | 88.07(16)  |
| S(7)-Ga(2)-S(8)#4      | 112.40(15) | S(9)-Mn(2)-S(6)      | 82.60(14)  |
| S(4)-Ga(2)-S(8)#4      | 107.1(2)   | S(5)#2-Mn(2)-S(6)    | 79.19(13)  |
| S(7)-Ga(2)-S(5)        | 110.56(16) | S(6)#5-Mn(2)-S(6)    | 86.4(3)    |
| S(4)-Ga(2)-S(5)        | 109.0(2)   | S(7)-Mn(3)-S(7)#8    | 95.81(19)  |
| S(8)#4-Ga(2)-S(5)      | 107.48(15) | S(7)-Mn(3)-S(8)      | 95.58(14)  |
| S(11)-Ga(3)-S(6)       | 123.32(15) | S(7)#8-Mn(3)-S(8)    | 95.58(14)  |
| S(11)-Ga(3)-S(10)      | 111.09(15) | S(7)-Mn(3)-S(6)#8    | 173.81(17) |
| S(6)-Ga(3)-S(10)       | 101.4(2)   | S(7)#8-Mn(3)-S(6)#8  | 88.62(16)  |
| S(11)-Ga(3)-S(9)       | 112.93(15) | S(8)-Mn(3)-S(6)#8    | 79.64(14)  |
| S(6)-Ga(3)-S(9)        | 100.1(2)   | S(7)-Mn(3)-S(6)      | 88.62(16)  |
| S(10)-Ga(3)-S(9)       | 106.15(15) | S(7)#8-Mn(3)-S(6)    | 173.81(17) |

---

|                                                |            |                                                 |            |
|------------------------------------------------|------------|-------------------------------------------------|------------|
| S(8)-Mn(3)-S(6)                                | 79.64(14)  | S(11) <sup>#8</sup> -Mn(5)-S(4) <sup>#20</sup>  | 85.90(15)  |
| S(6) <sup>#8</sup> -Mn(3)-S(6)                 | 86.7(3)    | S(11)-Mn(5)-S(4) <sup>#17</sup>                 | 85.90(14)  |
| S(7)-Mn(3)-S(10)                               | 101.99(15) | S(11) <sup>#8</sup> -Mn(5)-S(4) <sup>#17</sup>  | 176.6(2)   |
| S(7) <sup>#8</sup> -Mn(3)-S(10)                | 101.99(15) | S(4) <sup>#20</sup> -Mn(5)-S(4) <sup>#17</sup>  | 92.4(3)    |
| S(8)-Mn(3)-S(10)                               | 153.6(2)   | S(11)-Mn(5)-S(10) <sup>#17</sup>                | 90.32(14)  |
| S(6) <sup>#8</sup> -Mn(3)-S(10)                | 81.24(14)  | S(11) <sup>#8</sup> -Mn(5)-S(10) <sup>#17</sup> | 90.32(14)  |
| S(6)-Mn(3)-S(10)                               | 81.24(14)  | S(4) <sup>#20</sup> -Mn(5)-S(10) <sup>#17</sup> | 86.59(13)  |
| S(2) <sup>#22</sup> -Mn(4)-S(2) <sup>#13</sup> | 95.02(17)  | S(4) <sup>#17</sup> -Mn(5)-S(10) <sup>#17</sup> | 86.59(13)  |
| S(2) <sup>#22</sup> -Mn(4)-S(3)                | 93.76(14)  | S(11)-Mn(5)-S(1) <sup>#17</sup>                 | 100.11(16) |
| S(2) <sup>#13</sup> -Mn(4)-S(3)                | 93.76(14)  | S(11) <sup>#8</sup> -Mn(5)-S(1) <sup>#17</sup>  | 100.11(16) |
| S(2) <sup>#22</sup> -Mn(4)-S(6) <sup>#16</sup> | 175.93(19) | S(11) <sup>#16</sup> -Mn(6)-S(4)                | 85.63(14)  |
| S(2) <sup>#13</sup> -Mn(4)-S(6) <sup>#16</sup> | 87.52(14)  | S(11) <sup>#15</sup> -Mn(6)-S(4)                | 175.93(18) |
| S(3)-Mn(4)-S(6) <sup>#16</sup>                 | 89.24(12)  | S(11) <sup>#16</sup> -Mn(6)-S(4) <sup>#5</sup>  | 175.93(18) |
| S(2) <sup>#22</sup> -Mn(4)-S(6) <sup>#15</sup> | 87.52(14)  | S(11) <sup>#15</sup> -Mn(6)-S(4) <sup>#5</sup>  | 85.63(14)  |
| S(2) <sup>#13</sup> -Mn(4)-S(6) <sup>#15</sup> | 175.93(19) | S(4)-Mn(6)-S(4) <sup>#5</sup>                   | 91.2(3)    |
| S(3)-Mn(4)-S(6) <sup>#15</sup>                 | 89.24(12)  | S(11) <sup>#16</sup> -Mn(6)-S(9)                | 94.75(14)  |
| S(6) <sup>#16</sup> -Mn(4)-S(6) <sup>#15</sup> | 89.8(3)    | S(11) <sup>#15</sup> -Mn(6)-S(9)                | 94.75(14)  |
| S(2) <sup>#22</sup> -Mn(4)-S(5) <sup>#13</sup> | 98.22(17)  | S(4)-Mn(6)-S(9)                                 | 87.62(13)  |
| S(2) <sup>#13</sup> -Mn(4)-S(5) <sup>#13</sup> | 98.22(17)  | S(4) <sup>#5</sup> -Mn(6)-S(9)                  | 87.62(13)  |
| S(3)-Mn(4)-S(5) <sup>#13</sup>                 | 162.2(2)   | S(11) <sup>#16</sup> -Mn(6)-S(3)                | 96.69(16)  |
| S(6) <sup>#16</sup> -Mn(4)-S(5) <sup>#13</sup> | 78.24(16)  | S(11) <sup>#15</sup> -Mn(6)-S(3)                | 96.69(16)  |
| S(6) <sup>#15</sup> -Mn(4)-S(5) <sup>#13</sup> | 78.24(16)  | S(4)-Mn(6)-S(3)                                 | 80.26(15)  |
| S(11)-Mn(5)-S(11) <sup>#8</sup>                | 95.60(18)  | S(4) <sup>#5</sup> -Mn(6)-S(3)                  | 80.26(15)  |
| S(11)-Mn(5)-S(4) <sup>#20</sup>                | 176.6(2)   | S(9)-Mn(6)-S(3)                                 | 162.6(2)   |

Symmetry transformations used to generate equivalent atoms:

#1 -y+1,x-y,-z+2 #2 -y+1,x-y,z #3 -x+y+1,-x+1,-z+2

#4 x,y,-z+2 #5 -x+y+1,-x+1,z #6 -y,x-y,z

#7 -x+y,-x,-z+2 #8 -x+y,-x,z #9 -y,x-y,-z+2

#10 -x+y,-x+1,z #11 -y+1,x-y+1,-z+2 #12 -x+y,-x+1,-z+2

#13 -y+1,x-y+1,z #14 x,y,-z+1 #15 -y+1,x-y,-z+1

#16 -x+y,-x+1,-z+1

**Table S4d.** Selected distances (Å) and angles (degrees) for PbMn6Ga6S16.

|                 |          |                |          |
|-----------------|----------|----------------|----------|
| Pb(1)-S(7)#1    | 3.042(5) | Ga(1)-S(4)     | 2.280(3) |
| Pb(1)-S(7)#2    | 3.042(5) | Ga(1)-S(3)     | 2.299(5) |
| Pb(1)-S(7)#3    | 3.042(5) | Ga(1)-S(2)     | 2.301(5) |
| Pb(1)-S(7)      | 3.042(5) | Ga(2)-S(7)     | 2.221(4) |
| Pb(1)-S(7)#4    | 3.042(5) | Ga(2)-S(4)     | 2.297(3) |
| Pb(1)-S(7)#5    | 3.042(5) | Ga(2)-S(5)     | 2.312(5) |
| Pb(1A)-S(7)#6   | 3.032(5) | Ga(2)-S(6)     | 2.319(5) |
| Pb(1A)-S(7)#3   | 3.032(5) | Ga(3)-S(11)    | 2.227(4) |
| Pb(1A)-S(7)#7   | 3.032(5) | Ga(3)-S(8)     | 2.268(3) |
| Pb(1A)-S(7)     | 3.032(5) | Ga(3)-S(10)    | 2.320(5) |
| Pb(1A)-S(7)#8   | 3.032(5) | Ga(3)-S(9)     | 2.323(5) |
| Pb(1A)-S(7)#5   | 3.032(5) | Mn(1)-S(1)     | 2.528(6) |
| Pb(2)-S(1)#1    | 3.026(5) | Mn(1)-S(1)#1   | 2.528(6) |
| Pb(2)-S(1)      | 3.026(5) | Mn(1)-S(2)#9   | 2.639(9) |
| Pb(2)-S(1)#9    | 3.026(5) | Mn(1)-S(10)#22 | 2.653(9) |
| Pb(2)-S(1)#10   | 3.026(5) | Mn(1)-S(8)#13  | 2.719(5) |
| Pb(2)-S(1)#11   | 3.026(5) | Mn(1)-S(8)#22  | 2.719(5) |
| Pb(2)-S(1)#12   | 3.026(5) | Mn(2)-S(1)     | 2.524(6) |
| Pb(2A)-S(1)#6   | 3.023(5) | Mn(2)-S(1)#6   | 2.524(6) |
| Pb(2A)-S(1)     | 3.023(5) | Mn(2)-S(3)#9   | 2.644(8) |
| Pb(2A)-S(1)#13  | 3.023(5) | Mn(2)-S(9)#9   | 2.656(9) |
| Pb(2A)-S(1)#12  | 3.023(5) | Mn(2)-S(8)#9   | 2.689(5) |
| Pb(2A)-S(1)#9   | 3.023(5) | Mn(2)-S(8)#13  | 2.689(5) |
| Pb(2A)-S(1)#14  | 3.023(5) | Mn(3)-S(7)     | 2.541(6) |
| Pb(3)-S(11)#15  | 3.021(4) | Mn(3)-S(7)#6   | 2.541(6) |
| Pb(3)-S(11)#16  | 3.021(4) | Mn(3)-S(8)#6   | 2.607(4) |
| Pb(3)-S(11)#17  | 3.021(4) | Mn(3)-S(8)     | 2.607(4) |
| Pb(3)-S(11)#18  | 3.021(4) | Mn(3)-S(5)#3   | 2.633(8) |
| Pb(3)-S(11)#19  | 3.021(4) | Mn(3)-S(3)     | 2.694(9) |
| Pb(3)-S(11)     | 3.021(4) | Mn(4)-S(7)     | 2.545(6) |
| Pb(3A)-S(11)#20 | 3.028(4) | Mn(4)-S(7)#1   | 2.546(6) |
| Pb(3A)-S(11)#18 | 3.028(4) | Mn(4)-S(6)#3   | 2.614(8) |
| Pb(3A)-S(11)#15 | 3.028(4) | Mn(4)-S(8)#6   | 2.648(4) |
| Pb(3A)-S(11)#21 | 3.028(4) | Mn(4)-S(8)#23  | 2.648(4) |
| Pb(3A)-S(11)#6  | 3.028(4) | Mn(4)-S(2)     | 2.699(9) |
| Pb(3A)-S(11)    | 3.028(4) | Mn(5)-S(11)#6  | 2.522(5) |
| Ga(1)-S(1)      | 2.243(4) | Mn(5)-S(11)    | 2.522(5) |

|                      |           |                         |           |
|----------------------|-----------|-------------------------|-----------|
| Mn(5)-S(4)#3         | 2.604(4)  | S(7)-Pb(1A)-S(7)#5      | 86.69(15) |
| Mn(5)-S(4)#7         | 2.604(4)  | S(7)#8-Pb(1A)-S(7)#5    | 75.1(2)   |
| Mn(5)-S(9)#15        | 2.639(8)  | S(1)#1-Pb(2)-S(1)       | 75.8(2)   |
| Mn(5)-S(5)#3         | 2.782(9)  | S(1)#1-Pb(2)-S(1)#9     | 133.54(7) |
| Mn(6)-S(11)          | 2.512(5)  | S(1)-Pb(2)-S(1)#9       | 86.19(15) |
| Mn(6)-S(11)#19       | 2.512(5)  | S(1)#1-Pb(2)-S(1)#10    | 86.19(15) |
| Mn(6)-S(4)#7         | 2.570(4)  | S(1)-Pb(2)-S(1)#10      | 133.54(7) |
| Mn(6)-S(4)#24        | 2.570(4)  | S(1)#9-Pb(2)-S(1)#10    | 133.54(7) |
| Mn(6)-S(10)#15       | 2.623(9)  | S(1)#1-Pb(2)-S(1)#11    | 86.19(15) |
| Mn(6)-S(6)#24        | 2.785(9)  | S(1)-Pb(2)-S(1)#11      | 133.54(7) |
| S(7)#1-Pb(1)-S(7)#2  | 86.33(14) | S(1)#9-Pb(2)-S(1)#11    | 75.8(2)   |
| S(7)#1-Pb(1)-S(7)#3  | 133.47(7) | S(1)#10-Pb(2)-S(1)#11   | 86.19(15) |
| S(7)#2-Pb(1)-S(7)#3  | 75.6(2)   | S(1)#1-Pb(2)-S(1)#12    | 133.54(7) |
| S(7)#1-Pb(1)-S(7)    | 75.6(2)   | S(1)-Pb(2)-S(1)#12      | 86.19(15) |
| S(7)#2-Pb(1)-S(7)    | 133.47(7) | S(1)#9-Pb(2)-S(1)#12    | 86.19(15) |
| S(7)#3-Pb(1)-S(7)    | 86.33(14) | S(1)#10-Pb(2)-S(1)#12   | 75.8(2)   |
| S(7)#1-Pb(1)-S(7)#4  | 86.33(14) | S(1)#11-Pb(2)-S(1)#12   | 133.54(7) |
| S(7)#2-Pb(1)-S(7)#4  | 86.33(14) | S(1)#6-Pb(2A)-S(1)      | 75.7(2)   |
| S(7)#3-Pb(1)-S(7)#4  | 133.47(7) | S(1)#6-Pb(2A)-S(1)#13   | 86.30(15) |
| S(7)-Pb(1)-S(7)#4    | 133.47(7) | S(1)-Pb(2A)-S(1)#13     | 133.49(7) |
| S(7)#1-Pb(1)-S(7)#5  | 133.47(7) | S(1)#6-Pb(2A)-S(1)#12   | 133.49(7) |
| S(7)#2-Pb(1)-S(7)#5  | 133.47(7) | S(1)-Pb(2A)-S(1)#12     | 86.30(15) |
| S(7)#3-Pb(1)-S(7)#5  | 86.33(14) | S(1)#13-Pb(2A)-S(1)#12  | 133.48(7) |
| S(7)-Pb(1)-S(7)#5    | 86.33(14) | S(1)#6-Pb(2A)-S(1)#9    | 133.49(7) |
| S(7)#4-Pb(1)-S(7)#5  | 75.6(2)   | S(1)-Pb(2A)-S(1)#9      | 86.30(15) |
| S(7)#6-Pb(1A)-S(7)#3 | 133.31(7) | S(1)#13-Pb(2A)-S(1)#9   | 75.7(2)   |
| S(7)#6-Pb(1A)-S(7)#7 | 86.69(15) | S(1)#12-Pb(2A)-S(1)#9   | 86.30(15) |
| S(7)#3-Pb(1A)-S(7)#7 | 75.1(2)   | S(1)#6-Pb(2A)-S(1)#14   | 86.30(15) |
| S(7)#6-Pb(1A)-S(7)   | 75.1(2)   | S(1)-Pb(2A)-S(1)#14     | 133.49(7) |
| S(7)#3-Pb(1A)-S(7)   | 86.69(15) | S(1)#13-Pb(2A)-S(1)#14  | 86.30(15) |
| S(7)#7-Pb(1A)-S(7)   | 133.31(7) | S(1)#12-Pb(2A)-S(1)#14  | 75.7(2)   |
| S(7)#6-Pb(1A)-S(7)#8 | 86.69(15) | S(1)#9-Pb(2A)-S(1)#14   | 133.48(7) |
| S(7)#3-Pb(1A)-S(7)#8 | 133.31(7) | S(11)#15-Pb(3)-S(11)#16 | 133.46(6) |
| S(7)#7-Pb(1A)-S(7)#8 | 86.69(15) | S(11)#15-Pb(3)-S(11)#17 | 75.61(19) |
| S(7)-Pb(1A)-S(7)#8   | 133.31(7) | S(11)#16-Pb(3)-S(11)#17 | 86.36(14) |
| S(7)#6-Pb(1A)-S(7)#5 | 133.31(7) | S(11)#15-Pb(3)-S(11)#18 | 86.36(14) |
| S(7)#3-Pb(1A)-S(7)#5 | 86.69(15) | S(11)#16-Pb(3)-S(11)#18 | 75.61(19) |
| S(7)#7-Pb(1A)-S(7)#5 | 133.31(7) | S(11)#17-Pb(3)-S(11)#18 | 133.46(6) |

---

|                          |            |                        |            |
|--------------------------|------------|------------------------|------------|
| S(11)#15-Pb(3)-S(11)#19  | 133.46(6)  | S(8)-Ga(3)-S(10)       | 100.1(2)   |
| S(11)#16-Pb(3)-S(11)#19  | 86.36(14)  | S(11)-Ga(3)-S(9)       | 112.0(2)   |
| S(11)#17-Pb(3)-S(11)#19  | 86.36(14)  | S(8)-Ga(3)-S(9)        | 99.5(2)    |
| S(11)#18-Pb(3)-S(11)#19  | 133.46(6)  | S(10)-Ga(3)-S(9)       | 106.23(14) |
| S(11)#15-Pb(3)-S(11)     | 86.36(14)  | S(1)-Mn(1)-S(1)#1      | 94.7(3)    |
| S(11)#16-Pb(3)-S(11)     | 133.46(6)  | S(1)-Mn(1)-S(2)#9      | 94.34(19)  |
| S(11)#17-Pb(3)-S(11)     | 133.46(6)  | S(1)#1-Mn(1)-S(2)#9    | 94.34(19)  |
| S(11)#18-Pb(3)-S(11)     | 86.36(14)  | S(1)-Mn(1)-S(10)#22    | 103.33(18) |
| S(11)#19-Pb(3)-S(11)     | 75.61(19)  | S(1)#1-Mn(1)-S(10)#22  | 103.33(18) |
| S(11)#20-Pb(3A)-S(11)#18 | 133.56(6)  | S(2)#9-Mn(1)-S(10)#22  | 153.7(3)   |
| S(11)#20-Pb(3A)-S(11)#15 | 75.91(19)  | S(1)-Mn(1)-S(8)#13     | 88.57(13)  |
| S(11)#18-Pb(3A)-S(11)#15 | 86.14(14)  | S(1)#1-Mn(1)-S(8)#13   | 173.0(2)   |
| S(11)#20-Pb(3A)-S(11)#21 | 86.14(14)  | S(2)#9-Mn(1)-S(8)#13   | 79.29(16)  |
| S(11)#18-Pb(3A)-S(11)#21 | 75.91(19)  | S(10)#22-Mn(1)-S(8)#13 | 81.79(18)  |
| S(11)#15-Pb(3A)-S(11)#21 | 133.56(6)  | S(1)-Mn(1)-S(8)#22     | 173.0(2)   |
| S(11)#20-Pb(3A)-S(11)#6  | 86.14(14)  | S(1)#1-Mn(1)-S(8)#22   | 88.58(13)  |
| S(11)#18-Pb(3A)-S(11)#6  | 133.56(6)  | S(2)#9-Mn(1)-S(8)#22   | 79.29(16)  |
| S(11)#15-Pb(3A)-S(11)#6  | 133.56(6)  | S(10)#22-Mn(1)-S(8)#22 | 81.79(18)  |
| S(11)#21-Pb(3A)-S(11)#6  | 86.14(14)  | S(8)#13-Mn(1)-S(8)#22  | 87.50(19)  |
| S(11)#20-Pb(3A)-S(11)    | 133.56(6)  | S(1)-Mn(2)-S(1)#6      | 94.6(3)    |
| S(11)#18-Pb(3A)-S(11)    | 86.14(14)  | S(1)-Mn(2)-S(3)#9      | 93.63(19)  |
| S(11)#15-Pb(3A)-S(11)    | 86.14(14)  | S(1)#6-Mn(2)-S(3)#9    | 93.63(19)  |
| S(11)#21-Pb(3A)-S(11)    | 133.56(6)  | S(1)-Mn(2)-S(9)#9      | 103.74(18) |
| S(11)#6-Pb(3A)-S(11)     | 75.91(19)  | S(1)#6-Mn(2)-S(9)#9    | 103.74(18) |
| S(1)-Ga(1)-S(4)          | 112.36(13) | S(3)#9-Mn(2)-S(9)#9    | 154.2(3)   |
| S(1)-Ga(1)-S(3)          | 111.1(3)   | S(1)-Mn(2)-S(8)#9      | 172.1(2)   |
| S(4)-Ga(1)-S(3)          | 107.5(2)   | S(1)#6-Mn(2)-S(8)#9    | 89.33(14)  |
| S(1)-Ga(1)-S(2)          | 111.8(3)   | S(3)#9-Mn(2)-S(8)#9    | 79.22(16)  |
| S(4)-Ga(1)-S(2)          | 106.0(2)   | S(9)#9-Mn(2)-S(8)#9    | 81.95(17)  |
| S(3)-Ga(1)-S(2)          | 107.70(14) | S(1)-Mn(2)-S(8)#13     | 89.33(14)  |
| S(7)-Ga(2)-S(4)          | 120.19(13) | S(1)#6-Mn(2)-S(8)#13   | 172.1(2)   |
| S(7)-Ga(2)-S(5)          | 114.3(3)   | S(3)#9-Mn(2)-S(8)#13   | 79.22(16)  |
| S(4)-Ga(2)-S(5)          | 99.6(2)    | S(9)#9-Mn(2)-S(8)#13   | 81.95(17)  |
| S(7)-Ga(2)-S(6)          | 115.6(2)   | S(8)#9-Mn(2)-S(8)#13   | 85.98(19)  |
| S(4)-Ga(2)-S(6)          | 98.1(2)    | S(7)-Mn(3)-S(7)#6      | 93.4(3)    |
| S(5)-Ga(2)-S(6)          | 106.66(15) | S(7)-Mn(3)-S(8)#6      | 88.61(13)  |
| S(11)-Ga(3)-S(8)         | 124.62(13) | S(7)#6-Mn(3)-S(8)#6    | 177.78(19) |
| S(11)-Ga(3)-S(10)        | 112.2(2)   | S(7)-Mn(3)-S(8)        | 177.78(19) |

---

|                                               |            |                                                  |            |
|-----------------------------------------------|------------|--------------------------------------------------|------------|
| S(7) <sup>#6</sup> -Mn(3)-S(8)                | 88.61(13)  | S(11)-Mn(5)-S(4) <sup>#3</sup>                   | 177.8(2)   |
| S(8) <sup>#6</sup> -Mn(3)-S(8)                | 89.40(19)  | S(11) <sup>#6</sup> -Mn(5)-S(4) <sup>#7</sup>    | 177.8(2)   |
| S(7)-Mn(3)-S(5) <sup>#3</sup>                 | 90.95(19)  | S(11)-Mn(5)-S(4) <sup>#7</sup>                   | 86.10(13)  |
| S(7) <sup>#6</sup> -Mn(3)-S(5) <sup>#3</sup>  | 90.95(19)  | S(4) <sup>#3</sup> -Mn(5)-S(4) <sup>#7</sup>     | 92.56(19)  |
| S(8) <sup>#6</sup> -Mn(3)-S(5) <sup>#3</sup>  | 88.0(2)    | S(11) <sup>#6</sup> -Mn(5)-S(9) <sup>#15</sup>   | 92.15(17)  |
| S(8)-Mn(3)-S(5) <sup>#3</sup>                 | 88.0(2)    | S(11)-Mn(5)-S(9) <sup>#15</sup>                  | 92.15(17)  |
| S(7)-Mn(3)-S(3)                               | 100.83(17) | S(4) <sup>#3</sup> -Mn(5)-S(9) <sup>#15</sup>    | 85.96(16)  |
| S(7) <sup>#6</sup> -Mn(3)-S(3)                | 100.83(17) | S(4) <sup>#7</sup> -Mn(5)-S(9) <sup>#15</sup>    | 85.96(16)  |
| S(8) <sup>#6</sup> -Mn(3)-S(3)                | 79.78(18)  | S(11) <sup>#6</sup> -Mn(5)-S(5) <sup>#3</sup>    | 100.02(17) |
| S(8)-Mn(3)-S(3)                               | 79.77(18)  | S(11)-Mn(5)-S(5) <sup>#3</sup>                   | 100.02(17) |
| S(5) <sup>#3</sup> -Mn(3)-S(3)                | 162.7(3)   | S(4) <sup>#3</sup> -Mn(5)-S(5) <sup>#3</sup>     | 81.54(16)  |
| S(7)-Mn(4)-S(7) <sup>#1</sup>                 | 94.2(3)    | S(4) <sup>#7</sup> -Mn(5)-S(5) <sup>#3</sup>     | 81.54(16)  |
| S(7)-Mn(4)-S(6) <sup>#3</sup>                 | 92.16(19)  | S(9) <sup>#15</sup> -Mn(5)-S(5) <sup>#3</sup>    | 161.9(3)   |
| S(7) <sup>#1</sup> -Mn(4)-S(6) <sup>#3</sup>  | 92.16(19)  | S(11)-Mn(6)-S(11) <sup>#19</sup>                 | 95.0(2)    |
| S(7)-Mn(4)-S(8) <sup>#6</sup>                 | 87.63(13)  | S(11)-Mn(6)-S(4) <sup>#7</sup>                   | 87.02(13)  |
| S(7) <sup>#1</sup> -Mn(4)-S(8) <sup>#6</sup>  | 178.13(18) | S(11) <sup>#19</sup> -Mn(6)-S(4) <sup>#7</sup>   | 177.90(19) |
| S(6) <sup>#3</sup> -Mn(4)-S(8) <sup>#6</sup>  | 87.85(19)  | S(11)-Mn(6)-S(4) <sup>#24</sup>                  | 177.90(19) |
| S(7)-Mn(4)-S(8) <sup>#23</sup>                | 178.13(18) | S(11) <sup>#19</sup> -Mn(6)-S(4) <sup>#24</sup>  | 87.02(13)  |
| S(7) <sup>#1</sup> -Mn(4)-S(8) <sup>#23</sup> | 87.63(13)  | S(4) <sup>#7</sup> -Mn(6)-S(4) <sup>#24</sup>    | 90.94(19)  |
| S(6) <sup>#3</sup> -Mn(4)-S(8) <sup>#23</sup> | 87.85(19)  | S(11)-Mn(6)-S(10) <sup>#15</sup>                 | 93.09(17)  |
| S(8) <sup>#6</sup> -Mn(4)-S(8) <sup>#23</sup> | 90.50(19)  | S(11) <sup>#19</sup> -Mn(6)-S(10) <sup>#15</sup> | 93.09(17)  |
| S(7)-Mn(4)-S(2)                               | 100.07(17) | S(4) <sup>#7</sup> -Mn(6)-S(10) <sup>#15</sup>   | 86.28(17)  |
| S(7) <sup>#1</sup> -Mn(4)-S(2)                | 100.07(17) | S(4) <sup>#24</sup> -Mn(6)-S(10) <sup>#15</sup>  | 86.28(17)  |
| S(6) <sup>#3</sup> -Mn(4)-S(2)                | 161.9(3)   | S(11)-Mn(6)-S(6) <sup>#24</sup>                  | 99.07(17)  |
| S(8) <sup>#6</sup> -Mn(4)-S(2)                | 79.49(18)  | S(11) <sup>#19</sup> -Mn(6)-S(6) <sup>#24</sup>  | 99.07(17)  |
| S(8) <sup>#23</sup> -Mn(4)-S(2)               | 79.49(18)  | S(4) <sup>#7</sup> -Mn(6)-S(6) <sup>#24</sup>    | 81.10(16)  |
| S(11) <sup>#6</sup> -Mn(5)-S(11)              | 95.2(2)    | S(4) <sup>#24</sup> -Mn(6)-S(6) <sup>#24</sup>   | 81.10(16)  |
| S(11) <sup>#6</sup> -Mn(5)-S(4) <sup>#3</sup> | 86.10(13)  | S(10) <sup>#15</sup> -Mn(6)-S(6) <sup>#24</sup>  | 161.9(3)   |

Symmetry transformations used to generate equivalent atoms:

- #1 x,y,-z+2 #2 -y+1,x-y+1,-z+2 #3 -y+1,x-y+1,z  
#4 -x+y,-x+1,-z+2 #5 -x+y,-x+1,z #6 x,y,-z+1  
#7 -y+1,x-y+1,-z+1 #8 -x+y,-x+1,-z+1 #9 -y,x-y,z  
#10 -x+y,-x,-z+2 #11 -y,x-y,-z+2 #12 -x+y,-x,z  
#13 -y,x-y,-z+1 #14 -x+y,-x,-z+1 #15 -x+y+1,-x+1,z  
#16 -y+1,x-y,-z #17 -x+y+1,-x+1,-z #18 -y+1,x-y,z  
#19 x,y,-z #20 -x+y+1,-x+1,-z+1 #21 -y+1,x-y,-z+1  
#22 -y,x-y,z+1 #23 x,y,z+1 #24 -y+1,x-y+1,z-1  
#25 -x+y,-x+1,z+1 #26 x,y,z-1 #27 -x+y,-x,z-1

**Table S5a.** Bond length ( $l$  (Å)), the average bond length ( $L$  (Å)) and distortion degree ( $\Delta d$ ) of  $\text{MnS}_6$  or  $\text{MgS}_6$  octahedra in  $\text{MMn}_6\text{Ga}_6\text{S}_{16}$  ( $M=\text{Ca, Sr, Ba, Pb}$ ),  $\text{La}_3\text{MnGaS}_7$ ,  $\text{La}_6\text{MnGe}_2\text{S}_{14}$  and  $\text{AeMg}_6\text{Ga}_6\text{S}_{16}$  ( $\text{Ae}=\text{Ca, Sr, Ba}$ ).

| Compounds                               | Octahedral               | Bond | $l/\text{Å}$ |        |        |        |        |        | $L/\text{Å}$ | $\Delta d\%$ |
|-----------------------------------------|--------------------------|------|--------------|--------|--------|--------|--------|--------|--------------|--------------|
| $\text{CaMn}_6\text{Ga}_6\text{S}_{16}$ | $\text{Mn}(1)\text{S}_6$ | Mn-S | 2.534        | 2.534  | 2.604  | 2.669  | 2.73   | 2.73   | 2.6335       | 0.676%       |
|                                         | $\text{Mn}(2)\text{S}_6$ | Mn-S | 2.53         | 2.53   | 2.626  | 2.675  | 2.703  | 2.703  | 2.6278       | 0.545%       |
|                                         | $\text{Mn}(3)\text{S}_6$ | Mn-S | 2.556        | 2.556  | 2.612  | 2.612  | 2.655  | 2.67   | 2.6101       | 0.191%       |
|                                         | $\text{Mn}(4)\text{S}_6$ | Mn-S | 2.556        | 2.556  | 2.598  | 2.659  | 2.659  | 2.709  | 2.6228       | 0.327%       |
|                                         | $\text{Mn}(5)\text{S}_6$ | Mn-S | 2.523        | 2.523  | 2.576  | 2.624  | 2.624  | 2.797  | 2.6111       | 0.861%       |
|                                         | $\text{Mn}(6)\text{S}_6$ | Mn-S | 2.516        | 2.516  | 2.588  | 2.588  | 2.657  | 2.73   | 2.5991       | 0.578%       |
| $\text{SrMn}_6\text{Ga}_6\text{S}_{16}$ | $\text{Mn}(1)\text{S}_6$ | Mn-S | 2.518        | 2.518  | 2.582  | 2.582  | 2.703  | 2.755  | 2.6096       | 0.803%       |
|                                         | $\text{Mn}(2)\text{S}_6$ | Mn-S | 2.501        | 2.501  | 2.598  | 2.611  | 2.611  | 2.818  | 2.6066       | 1.120%       |
|                                         | $\text{Mn}(3)\text{S}_6$ | Mn-S | 2.544        | 2.544  | 2.611  | 2.611  | 2.679  | 2.699  | 2.6146       | 0.354%       |
|                                         | $\text{Mn}(4)\text{S}_6$ | Mn-S | 2.522        | 2.522  | 2.651  | 2.697  | 2.707  | 2.707  | 2.6343       | 0.667%       |
|                                         | $\text{Mn}(5)\text{S}_6$ | Mn-S | 2.531        | 2.531  | 2.602  | 2.653  | 2.653  | 2.728  | 2.6163       | 0.499%       |
|                                         | $\text{Mn}(6)\text{S}_6$ | Mn-S | 2.514        | 2.514  | 2.628  | 2.68   | 2.723  | 2.723  | 2.6303       | 0.779%       |
| $\text{BaMn}_6\text{Ga}_6\text{S}_{16}$ | $\text{Mn}(1)\text{S}_6$ | Mn-S | 2.527        | 2.527  | 2.632  | 2.632  | 2.653  | 2.719  | 2.6150       | 0.472%       |
|                                         | $\text{Mn}(2)\text{S}_6$ | Mn-S | 2.505        | 2.505  | 2.607  | 2.707  | 2.723  | 2.723  | 2.6283       | 0.917%       |
|                                         | $\text{Mn}(3)\text{S}_6$ | Mn-S | 2.495        | 2.495  | 2.685  | 2.707  | 2.707  | 2.744  | 2.6388       | 1.064%       |
|                                         | $\text{Mn}(4)\text{S}_6$ | Mn-S | 2.506        | 2.506  | 2.617  | 2.64   | 2.64   | 2.84   | 2.6248       | 1.251%       |
|                                         | $\text{Mn}(5)\text{S}_6$ | Mn-S | 2.505        | 2.505  | 2.573  | 2.573  | 2.744  | 2.808  | 2.6180       | 1.359%       |
|                                         | $\text{Mn}(6)\text{S}_6$ | Mn-S | 2.481        | 2.481  | 2.608  | 2.608  | 2.649  | 2.849  | 2.6126       | 1.531%       |
| $\text{PbMn}_6\text{Ga}_6\text{S}_{16}$ | $\text{Mn}(1)\text{S}_6$ | Mn-S | 2.528        | 2.528  | 2.639  | 2.653  | 2.719  | 2.719  | 2.6310       | 0.621%       |
|                                         | $\text{Mn}(2)\text{S}_6$ | Mn-S | 2.524        | 2.524  | 2.644  | 2.656  | 2.689  | 2.689  | 2.6210       | 0.497%       |
|                                         | $\text{Mn}(3)\text{S}_6$ | Mn-S | 2.541        | 2.541  | 2.607  | 2.607  | 2.633  | 2.694  | 2.6038       | 0.282%       |
|                                         | $\text{Mn}(4)\text{S}_6$ | Mn-S | 2.545        | 2.546  | 2.614  | 2.648  | 2.648  | 2.699  | 2.6166       | 0.315%       |
|                                         | $\text{Mn}(5)\text{S}_6$ | Mn-S | 2.522        | 2.522  | 2.604  | 2.604  | 2.639  | 2.782  | 2.6121       | 0.659%       |
|                                         | $\text{Mn}(6)\text{S}_6$ | Mn-S | 2.512        | 2.512  | 2.57   | 2.57   | 2.623  | 2.785  | 2.5953       | 0.865%       |
| $\text{La}_3\text{MnGaS}_7$             | $\text{MnS}_6$           | Mn-S | 2.6218       | 2.6218 | 2.6218 | 2.5806 | 2.5806 | 2.5806 | 2.6012       | 0.042%       |
| $\text{La}_6\text{MnGe}_2\text{S}_{14}$ | $\text{MnS}_6$           | Mn-S | 2.6417       | 2.6417 | 2.6417 | 2.6794 | 2.6794 | 2.6794 | 2.6606       | 0.036%       |
| $\text{CaMg}_6\text{Ga}_6\text{S}_{16}$ | $\text{Mg}(1)\text{S}_6$ | Mg-S | 2.513        | 2.513  | 2.558  | 2.558  | 2.646  | 2.729  | 2.586        | 0.605%       |
|                                         | $\text{Mg}(2)\text{S}_6$ | Mg-S | 2.508        | 2.508  | 2.527  | 2.605  | 2.605  | 2.78   | 2.589        | 0.899%       |
|                                         | $\text{Mg}(3)\text{S}_6$ | Mg-S | 2.534        | 2.534  | 2.604  | 2.604  | 2.631  | 2.667  | 2.596        | 0.235%       |
|                                         | $\text{Mg}(4)\text{S}_6$ | Mg-S | 2.544        | 2.544  | 2.582  | 2.655  | 2.655  | 2.701  | 2.614        | 0.363%       |
|                                         | $\text{Mg}(5)\text{S}_6$ | Mg-S | 2.518        | 2.518  | 2.615  | 2.664  | 2.681  | 2.681  | 2.613        | 0.498%       |
|                                         | $\text{Mg}(6)\text{S}_6$ | Mg-S | 2.525        | 2.525  | 2.596  | 2.669  | 2.712  | 2.712  | 2.623        | 0.632%       |
|                                         | $\text{Mg}(1)\text{S}_6$ | Mg-S | 2.506        | 2.506  | 2.56   | 2.56   | 2.678  | 2.758  | 2.595        | 0.863%       |
|                                         | $\text{Mg}(2)\text{S}_6$ | Mg-S | 2.499        | 2.499  | 2.589  | 2.589  | 2.606  | 2.779  | 2.594        | 0.874%       |

|                                                   |                     |      |       |       |       |       |       |       |       |        |
|---------------------------------------------------|---------------------|------|-------|-------|-------|-------|-------|-------|-------|--------|
| SrMg <sub>6</sub> Ga <sub>6</sub> S <sub>16</sub> | Mg(3)S <sub>6</sub> | Mg-S | 2.52  | 2.52  | 2.606 | 2.606 | 2.661 | 2.705 | 2.603 | 0.459% |
|                                                   | Mg(4)S <sub>6</sub> | Mg-S | 2.524 | 2.524 | 2.642 | 2.642 | 2.593 | 2.705 | 2.605 | 0.433% |
|                                                   | Mg(5)S <sub>6</sub> | Mg-S | 2.525 | 2.525 | 2.678 | 2.678 | 2.617 | 2.714 | 2.623 | 0.560% |
|                                                   | Mg(6)S <sub>6</sub> | Mg-S | 2.496 | 2.496 | 2.717 | 2.717 | 2.699 | 2.61  | 2.623 | 0.931% |
| BaMg <sub>6</sub> Ga <sub>6</sub> S <sub>16</sub> | Mg(1)S <sub>6</sub> | Mg-S | 2.504 | 2.504 | 2.552 | 2.552 | 2.737 | 2.757 | 2.601 | 1.101% |
|                                                   | Mg(2)S <sub>6</sub> | Mg-S | 2.467 | 2.467 | 2.592 | 2.592 | 2.63  | 2.821 | 2.595 | 1.418% |
|                                                   | Mg(3)S <sub>6</sub> | Mg-S | 2.507 | 2.507 | 2.614 | 2.614 | 2.711 | 2.721 | 2.612 | 0.729% |
|                                                   | Mg(4)S <sub>6</sub> | Mg-S | 2.498 | 2.498 | 2.632 | 2.632 | 2.634 | 2.72  | 2.602 | 0.640% |
|                                                   | Mg(5)S <sub>6</sub> | Mg-S | 2.5   | 2.5   | 2.643 | 2.686 | 2.686 | 2.775 | 2.632 | 1.020% |
|                                                   | Mg(6)S <sub>6</sub> | Mg-S | 2.481 | 2.481 | 2.637 | 2.675 | 2.691 | 2.691 | 2.609 | 0.856% |

**Table S5b.** Bond length ( $l$  (Å)), the average bond length ( $L$  (Å)) and distortion degree ( $\Delta d$ ) of GaS<sub>4</sub> tetrahedra in MMn<sub>6</sub>Ga<sub>6</sub>S<sub>16</sub> (M=Ca, Sr, Ba, Pb), La<sub>3</sub>MnGaS<sub>7</sub>, LiGaS<sub>2</sub>,  $\alpha$ -BaGa<sub>4</sub>S<sub>7</sub> and AeMg<sub>6</sub>Ga<sub>6</sub>S<sub>16</sub> (Ae=Ca, Sr, Ba).

| Compounds                                         | Tetrahedron         | Bond | $l/\text{Å}$ |       |       |       | $L/\text{Å}$ | $\Delta d\%$ |
|---------------------------------------------------|---------------------|------|--------------|-------|-------|-------|--------------|--------------|
| CaMn <sub>6</sub> Ga <sub>6</sub> S <sub>16</sub> | Ga(1)S <sub>4</sub> | Ga-S | 2.212        | 2.229 | 2.312 | 2.320 | 2.2682       | 0.232%       |
|                                                   | Ga(2)S <sub>4</sub> | Ga-S | 2.227        | 2.275 | 2.324 | 2.336 | 2.2905       | 0.187%       |
|                                                   | Ga(3)S <sub>4</sub> | Ga-S | 2.226        | 2.275 | 2.297 | 2.297 | 2.2737       | 0.084%       |
| SrMn <sub>6</sub> Ga <sub>6</sub> S <sub>16</sub> | Ga(1)S <sub>4</sub> | Ga-S | 2.224        | 2.269 | 2.321 | 2.338 | 2.2880       | 0.201%       |
|                                                   | Ga(2)S <sub>4</sub> | Ga-S | 2.235        | 2.284 | 2.298 | 2.306 | 2.2807       | 0.076%       |
|                                                   | Ga(3)S <sub>4</sub> | Ga-S | 2.219        | 2.299 | 2.308 | 2.327 | 2.2882       | 0.170%       |
| BaMn <sub>6</sub> Ga <sub>6</sub> S <sub>16</sub> | Ga(1)S <sub>4</sub> | Ga-S | 2.223        | 2.298 | 2.32  | 2.322 | 2.2907       | 0.162%       |
|                                                   | Ga(2)S <sub>4</sub> | Ga-S | 2.234        | 2.287 | 2.301 | 2.314 | 2.2840       | 0.093%       |
|                                                   | Ga(3)S <sub>4</sub> | Ga-S | 2.225        | 2.26  | 2.326 | 2.328 | 2.2847       | 0.194%       |
| PbMn <sub>6</sub> Ga <sub>6</sub> S <sub>16</sub> | Ga(1)S <sub>4</sub> | Ga-S | 2.243        | 2.28  | 2.299 | 2.301 | 2.2807       | 0.052%       |
|                                                   | Ga(2)S <sub>4</sub> | Ga-S | 2.221        | 2.297 | 2.312 | 2.319 | 2.2872       | 0.152%       |
|                                                   | Ga(3)S <sub>4</sub> | Ga-S | 2.227        | 2.268 | 2.32  | 2.323 | 2.2845       | 0.158%       |
| La <sub>3</sub> MnGaS <sub>7</sub>                | GaS <sub>4</sub>    | Ga-S | 2.226        | 2.279 | 2.279 | 2.279 | 2.268        | 0.052%       |
| CaMg <sub>6</sub> Ga <sub>6</sub> S <sub>16</sub> | Ga(1)S <sub>4</sub> | Ga-S | 2.223        | 2.273 | 2.294 | 2.295 | 2.271        | 0.085%       |
|                                                   | Ga(2)S <sub>4</sub> | Ga-S | 2.212        | 2.29  | 2.308 | 2.317 | 2.282        | 0.172%       |
|                                                   | Ga(3)S <sub>4</sub> | Ga-S | 2.217        | 2.264 | 2.312 | 2.329 | 2.281        | 0.191%       |
| SrMg <sub>6</sub> Ga <sub>6</sub> S <sub>16</sub> | Ga(1)S <sub>4</sub> | Ga-S | 2.224        | 2.277 | 2.29  | 2.216 | 2.252        | 0.104%       |
|                                                   | Ga(2)S <sub>4</sub> | Ga-S | 2.216        | 2.289 | 2.313 | 2.314 | 2.283        | 0.160%       |
|                                                   | Ga(3)S <sub>4</sub> | Ga-S | 2.216        | 2.267 | 2.313 | 2.34  | 2.284        | 0.222%       |
| BaMg <sub>6</sub> Ga <sub>6</sub> S <sub>16</sub> | Ga(1)S <sub>4</sub> | Ga-S | 2.223        | 2.281 | 2.298 | 2.301 | 2.276        | 0.099%       |
|                                                   | Ga(2)S <sub>4</sub> | Ga-S | 2.215        | 2.294 | 2.297 | 2.33  | 2.284        | 0.179%       |
|                                                   | Ga(3)S <sub>4</sub> | Ga-S | 2.212        | 2.271 | 2.326 | 2.336 | 2.286        | 0.245%       |
| LiGaS <sub>2</sub>                                | GaS <sub>4</sub>    | Ga-S | 2.278        | 2.269 | 2.28  | 2.281 | 2.278        | 0.002%       |



|                                            |                     |      |       |       |       |       |       |        |
|--------------------------------------------|---------------------|------|-------|-------|-------|-------|-------|--------|
| $\alpha$ -BaGa <sub>4</sub> S <sub>7</sub> | Ga(1)S <sub>4</sub> | Ga-S | 2.338 | 2.325 | 2.229 | 2.229 | 2.281 | 0.268% |
|                                            | Ga(2)S <sub>4</sub> | Ga-S | 2.256 | 2.271 | 2.324 | 2.247 | 2.275 | 0.089% |

**Table S6.** The diameters of three size of channels in compounds

| <b>Compounds</b>                                    | <b>Small size</b> | <b>Medium size</b> | <b>Maximum size</b> |
|-----------------------------------------------------|-------------------|--------------------|---------------------|
| <b>AgMg<sub>3</sub>Ga<sub>3</sub>S<sub>8</sub></b>  | 5.9974            | 6.1638             | 6.1966              |
| <b>LiMg<sub>3</sub>Ga<sub>3</sub>S<sub>8</sub></b>  | 6.4100            | 6.4286             | 6.5322              |
| <b>NaMg<sub>3</sub>Ga<sub>3</sub>S<sub>8</sub></b>  | 6.4873            | 6.5144             | 6.6227              |
| <b>CaMg<sub>6</sub>Ga<sub>6</sub>S<sub>16</sub></b> | 6.5402            | 6.5556             | 6.6681              |
| <b>CaMn<sub>6</sub>Ga<sub>6</sub>S<sub>16</sub></b> | 6.5438            | 6.5642             | 6.6841              |

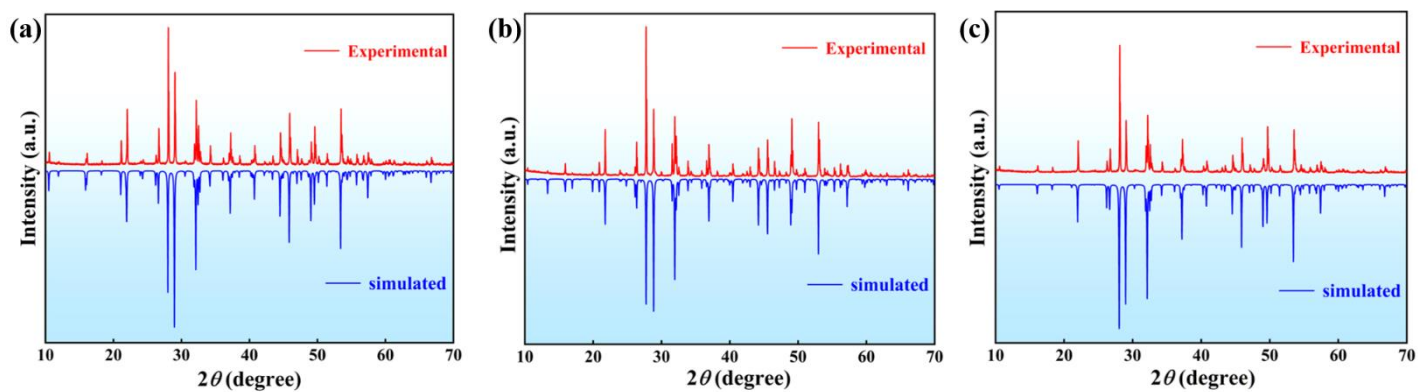

**Figure S1.** Experimental and simulated powder X-ray diffraction patterns of compounds  $\text{SrMn}_6\text{Ga}_6\text{S}_{16}$ (a),  $\text{BaMn}_6\text{Ga}_6\text{S}_{16}$  (b) and  $\text{PbMn}_6\text{Ga}_6\text{S}_{16}$ (c).

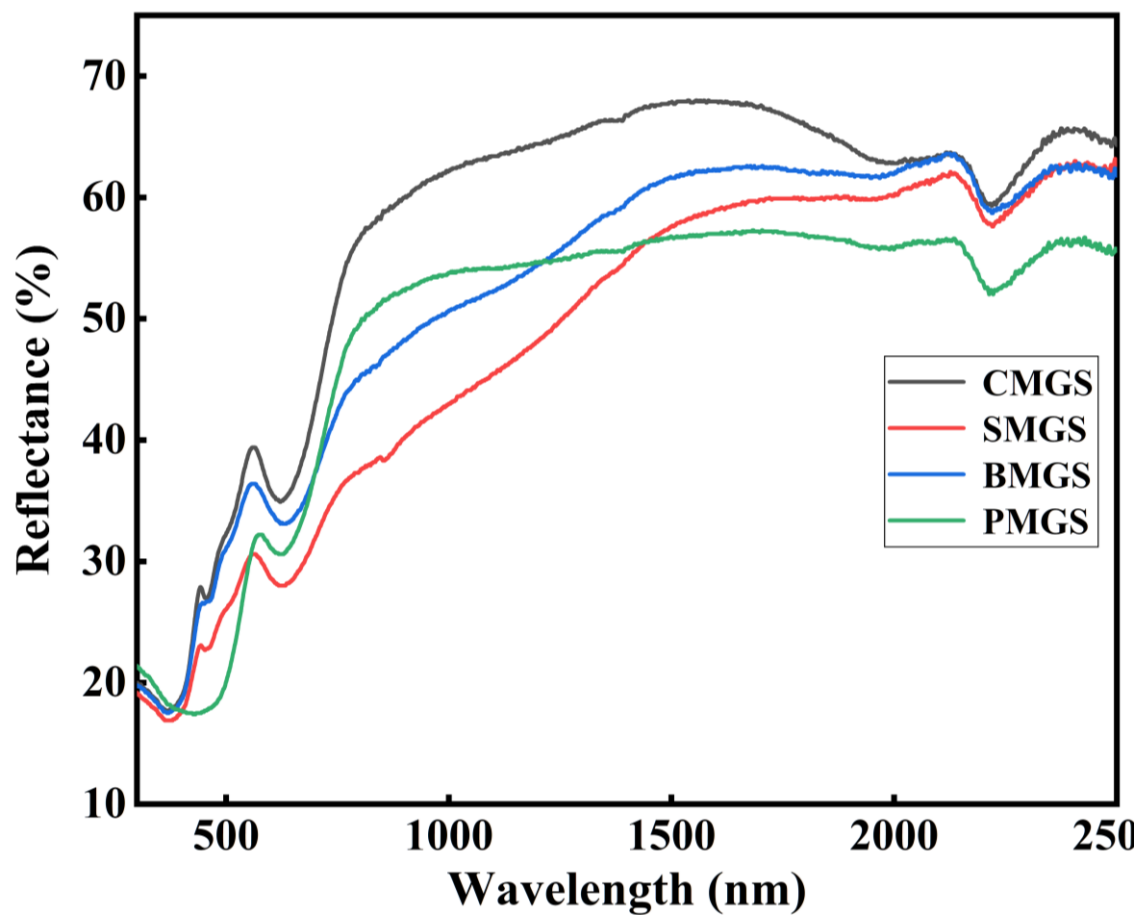

**Figure S2.** The UV-vis-NIR diffuse reflectance spectra for  $MMn_6Ga_6S_{16}$  ( $M=Ca, Sr, Ba, Pb$ ).

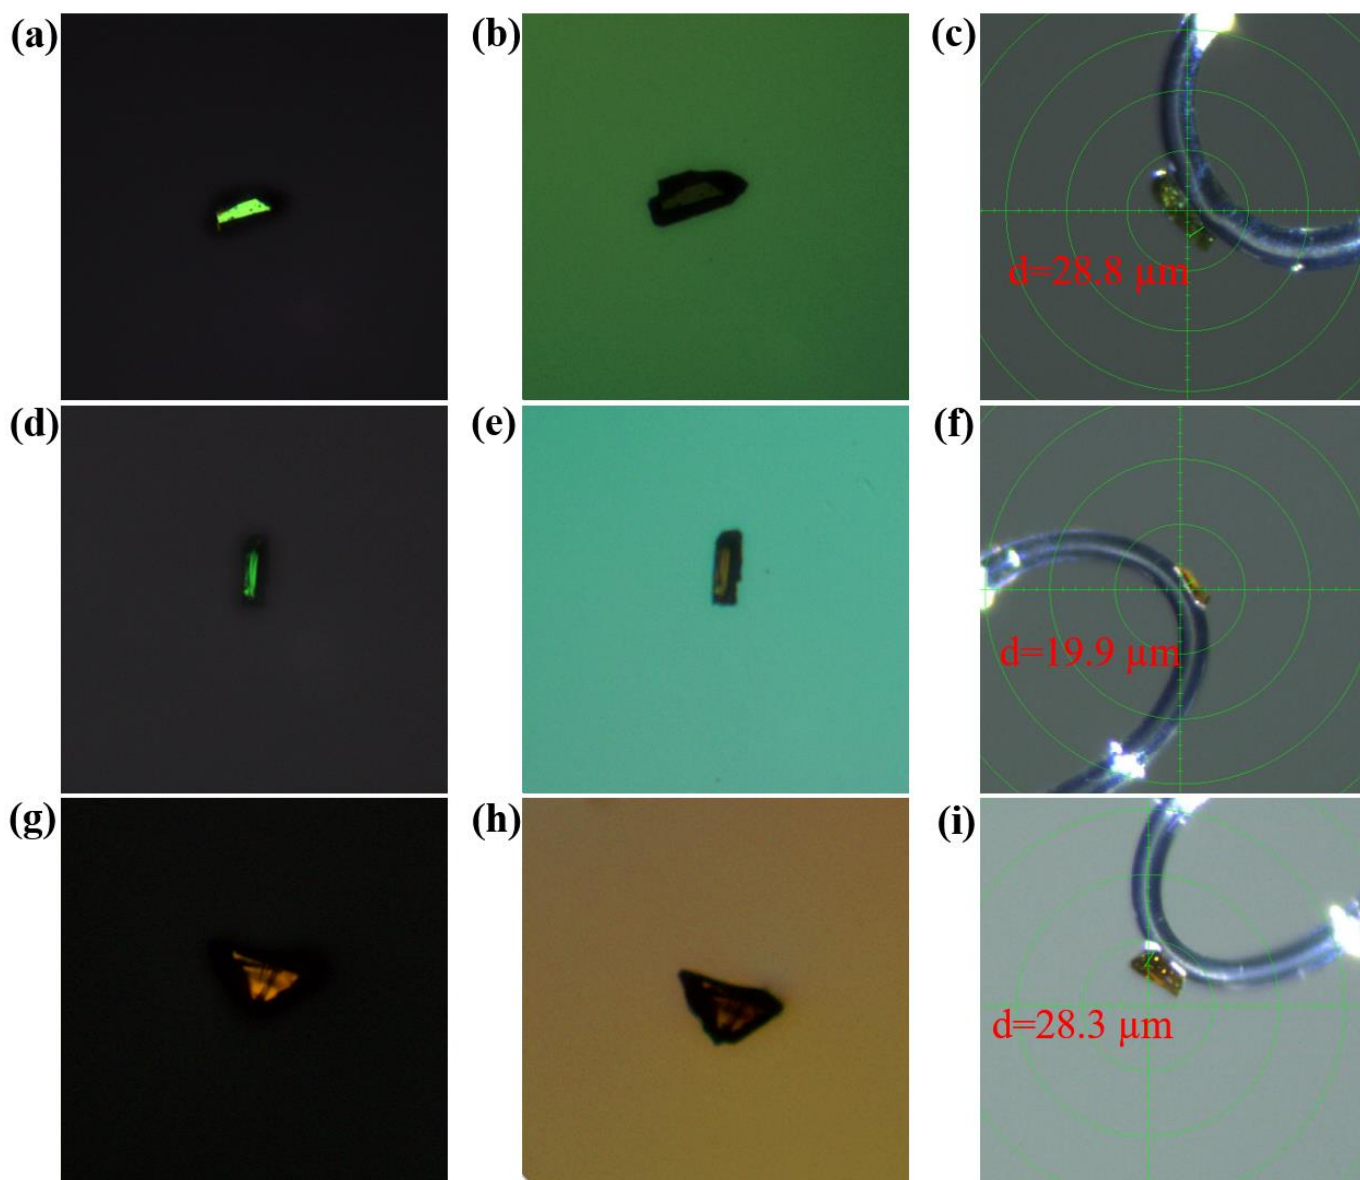

**Figure S3.** (a-c) The original interference color, extinction, and thickness of the SrMn<sub>6</sub>Ga<sub>6</sub>S<sub>16</sub> crystal, respectively; (d-f) The original interference color, extinction, and thickness of the BaMn<sub>6</sub>Ga<sub>6</sub>S<sub>16</sub> crystal, respectively; (g-i) The original interference color, extinction, and thickness of the PbMn<sub>6</sub>Ga<sub>6</sub>S<sub>16</sub> crystal, respectively.

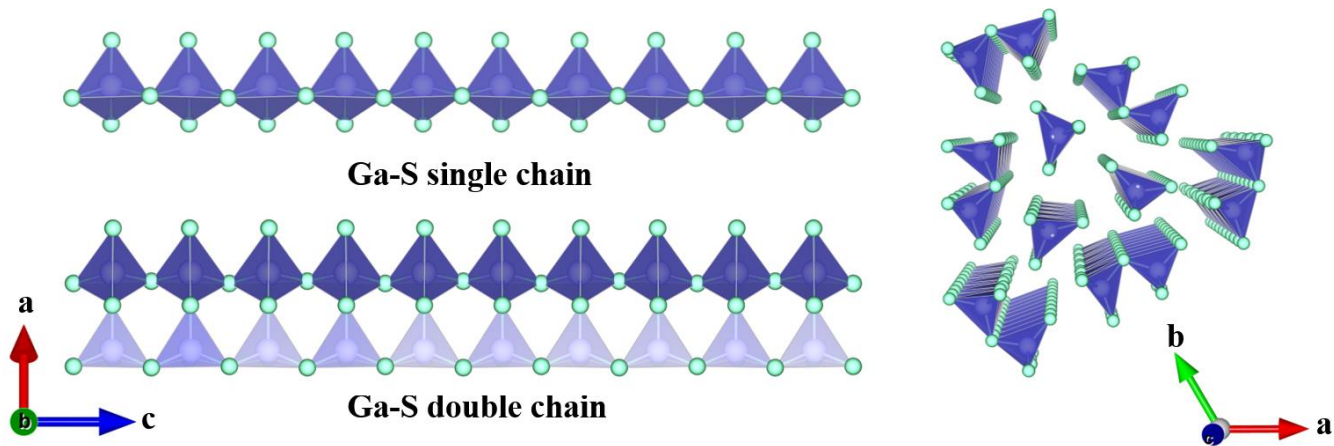

**Figure S4.** The arrangement of GaS<sub>4</sub> tetrahedra in the structure of MMn<sub>6</sub>Ga<sub>6</sub>S<sub>16</sub> (M=Ca, Sr, Ba, Pb).

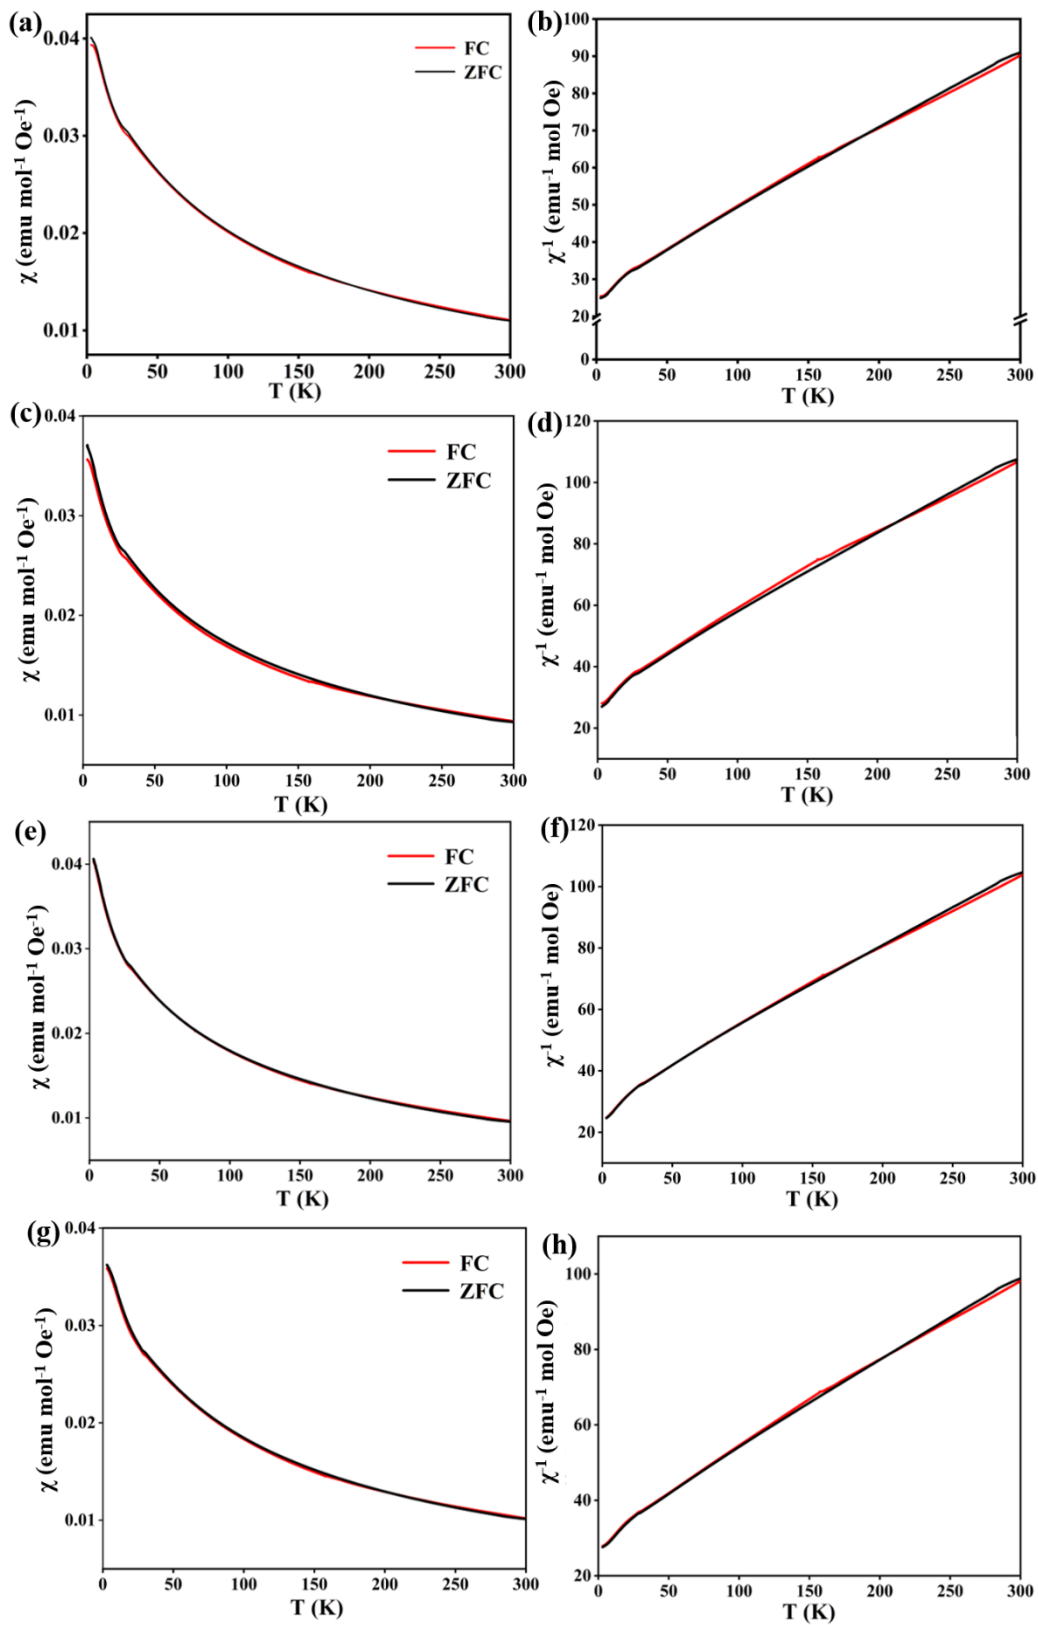

**Figure S5.** The magnetization curve of  $\text{CaMn}_6\text{Ga}_6\text{S}_{16}$  (a),  $\text{SrMn}_6\text{Ga}_6\text{S}_{16}$  (c),  $\text{BaMn}_6\text{Ga}_6\text{S}_{16}$  (e) and  $\text{PbMn}_6\text{Ga}_6\text{S}_{16}$  (g) under zero-field-cooling (ZFC) and field cooling (FC). b d f h) shows the plots of inverse of susceptibility( $1/\chi$ ) versus temperature (T).

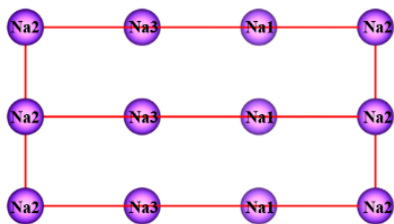

Na<sup>+</sup> in NaMg<sub>3</sub>Ga<sub>3</sub>S<sub>8</sub>

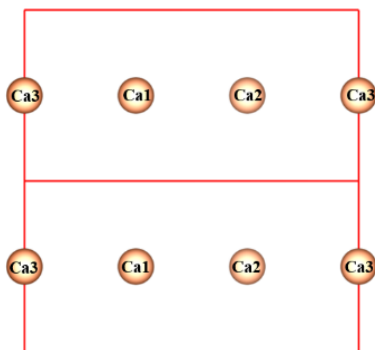

Ca<sup>2+</sup> in CaMn<sub>6</sub>Ga<sub>6</sub>S<sub>16</sub>

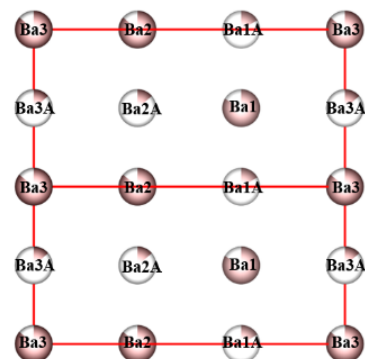

Ba<sup>2+</sup> in BaMn<sub>6</sub>Ga<sub>6</sub>S<sub>16</sub>

**Figure S6.** The arrangement of A-site cations in compounds NaMg<sub>3</sub>Ga<sub>3</sub>S<sub>8</sub>, CaMn<sub>6</sub>Ga<sub>6</sub>S<sub>16</sub> and BaMn<sub>6</sub>Ga<sub>6</sub>S<sub>16</sub>.
